1        **Dynamic characteristics and Functional Analysis Provide new insights into the**  
2        **role of *GauERF105* in resistance against Verticillium wilt in Cotton**

3

4        **Yanqing Wang<sup>1,2†</sup>, Muhammad Jawad Umer<sup>1†</sup>, Yuqing HOU<sup>1†</sup>, Yanchao XU<sup>1</sup>, Teame**  
5        **Gereziher MEHARI<sup>1,3</sup>, Jie ZHENG<sup>1</sup>, Yuhong WANG<sup>1</sup>, CAI<sup>1</sup>, Zhongli ZHOU<sup>1</sup>, Zhikun LI<sup>2\*</sup>**  
6        **and Fang LIU<sup>1,4\*</sup>**

7

8

9            1- State Key Laboratory of Cotton Biology/Institute of Cotton Research, Chinese Academy of  
10            Agricultural Sciences (ICR, CAAS), Anyang, Henan, 455000, China

11            2- College of Agronomy, Hebei Agricultural University/North China Key Laboratory for Crop Germplasm  
12            Resources of Ministry of Education, Baoding, Hebei, 071001, China

13            3- Ethiopian Institute of Agricultural Research, Mekhoni Agricultural Research Center, P.O  
14            BOX 47, Mekhoni, Tigray, Ethiopia

15            4- School of Agricultural sciences, Zhengzhou University, Zhengzhou, Henan, 450001, China

16            \*Correspondence should be addressed to Zhikun Li (lzk790319@163.com) and Fang Liu  
17            (liufcri@163.com) Tel.: +86-13949507902

18            †These authors contributed equally to this work

19

20 **Abstract:**

21 Verticillium wilt is the most devastating disease of cotton and it results in huge yield  
22 losses every year in the fields. The underlying mechanisms of VW in cotton are not  
23 well explored yet. In the current approach we used the transcriptome data from *G.*  
24 *australe* in response to Verticillium wilt attack to mine the ERF TFs and prove their  
25 potential role in resistance against VW attack in cotton. We identified 23 ERFs in  
26 total, and on the basis of expression at different time points i.e., 24h, 48h and 72h post  
27 inoculation and selected *GauERF105* for further validation. We performed VIGS in  
28 cotton and over expression in Arabidopsis respectively. Moreover, DAB and trypan  
29 staining also suggests that the impact of disease was more in the wildtype as  
30 compared to transgene lines. On the basis of our results, we confirmed that  
31 *GauERF105* is the key candidate and playing a key role for defending cotton against  
32 VW attack. Current finding might be helpful for generating resistance germplasm in  
33 cotton and it will be beneficial to recover the yield losses in field.

34 **Keywords:** Verticillium wilt, Cotton, ERF, VIGS, Overexpression

## 35 1. Introduction

36 Cotton is an economic crop, while verticillium wilt severely restricts cotton  
37 production (T. Li, Zhang, Jiang, Li, & Dhar, 2021). Cotton is one of the species of  
38 Malvaceae with high economic value and wide geographical distribution. There are a  
39 total of 53 species of cotton (Kunbo, Wendel, & Jinping, 2018), of which 46 diploid  
40 cotton species divided into 8 genome groups of A, B, C, D, E, F, G, and K. The  
41 remaining 7 tetraploid cotton species (AD)<sub>1</sub>-(AD)<sub>7</sub> belong to one allopolyploid  
42 genome(Beasley, 1942; Fryxell, 1992; Phillips, 1966). The A, B, E and F cotton type  
43 genomes are distributed in Asia and Africa, the C, G and K cotton type genomes are  
44 distributed in Australia, and the D and AD cotton type genomes are distributed in the  
45 America.

46 Verticillium wilt can infect the vascular bundles of cotton plant. Verticillium wilt  
47 was first discovered in the United States in 1915, and then introduced to China in  
48 1935, and successively broke out in major cotton production areas (Jian, Lu, Xiu,  
49 Wang, & Zhang, 2004). *Verticillium dahliae* is the pathogen of cotton verticillium  
50 wilt, which is mainly divided into *Verticillium dahlia* and *Verticillium albo-atrum*.  
51 *Verticillium dahliae* can cause the wilt of a variety of plants. In addition to cotton,  
52 fruits, and vegetables such as potatoes, tomatoes, grapes, and some woody plants can  
53 be attacked by *Verticillium dahliae* (Barbara, 2003). The main host of Verticillium  
54 black and white are alfalfa, hops, soybeans, tomatoes, potatoes, and some weeds  
55 (Chen, Lee, & Robb, 2004; Ligoxigakis, Vakalounakis, & Thanassoulopoulos, 2002).  
56 After investigations, the diseases in cotton fields in China are mainly caused by  
57 *Verticillium dahliae* (Yinhua et al., 2014).

58 Cotton verticillium wilt is one of the soil-borne fungal vascular disease, which  
59 leads to yearly yield losses of over 30% and a severe economic loss of roughly 250–  
60 310 million dollars for China (Gong et al., 2017). Though, it is hard to control  
61 pathogenic harm to cotton plants, despite the fact that many attempts were made,  
62 among them are the use of fungicides as well as cultural methods (Mohamed &  
63 Akladios, 2017; Wei & Yu, 2018). Generally, protecting plants from pathogenic  
64 damage, disease-resistant cultivars must be widely planted. Although certain

65 genes/proteins/TFs were characterized in cotton plant protection against pathogens,  
66 several effective candidate genes were updated for their use in disease-resistant  
67 breeding (Cai et al., 2009; Gong et al., 2017; Zeng, Chen, Luo, & Tian, 2016). Thus,  
68 molecular mechanisms of plant resistance against the *V. dahliae* as well as the  
69 functional analysis of genes linked to defense must be explored deeply.

70 The ERF transcription factor contains an AP2 domain, which is composed of a  
71 transcription regulatory domain, a DNA domain, and a nuclear localization sequence  
72 (NLS). In addition, some ERF family members contain oligomerization sites and  
73 phosphoric acid modification sites to regulate gene expression. At the N-terminus of  
74 the ERF domain is a basic hydrophilic region, which contains 3  $\beta$ -sheet structures, in  
75 which the 14<sup>th</sup> alanine and 19<sup>th</sup> aspartic acid residues in the second  $\beta$ -sheet helps in  
76 binding ERF transcription factors to different cis-acting elements (Stockinger,  
77 Gilmour, & Thomashow, 1997). DRE / CRT (Dehydration response element, DRE;  
78 C-repeat, CRT) and GCC-box are the main cis-acting elements that ERF binds with.  
79 Among them, DRE/CRT is mainly related to abiotic stress, and GCC-box is mainly  
80 involved in regulating biotic stress. The promoter region of many drought  
81 response-related genes contains a large amount of DRE, and its core sequence is  
82 TACCGACAT (Kizis & Pagès, 2002). The core sequence TGGCCGAC of CRT  
83 element is mainly present in low temperature response genes. It is precisely because  
84 the cis-elements of DRE/CRT have the core sequence CCGAC, which is usually  
85 related to temperature, salt, and drought, so they are usually referred to as the  
86 cis-acting elements of DRE/CRT (Fujimoto, Ohta, Usui, Shinshi, & Ohme-Takagi,  
87 2000; Kizis & Pagès, 2002). GCC-box has a conservative AGCCGCC sequence,  
88 which is generally present in the promoter regions of many disease-related protein  
89 genes. ERF can respond to some biological stress responses by combining with  
90 GCC-box (Meng et al., 2010; H.-J. Yang et al., 2002).

91 Among the signal pathways that plants respond to biological stress, the ethylene  
92 signaling pathway plays an important role, and many disease-resistant genes are  
93 induced and regulated by this signal pathway (C. Yang, Lu, Ma, Chen, & Zhang,  
94 2015). Overexpression of *AtERF1* directly activates the expression of plant defensins

95 (PDF1.2) and improves plant resistance to pathogens (Berrocal - Lobo, Molina, &  
96 Solano, 2002; Lorenzo, Piqueras, Sánchez-Serrano, & Solano, 2003). The T-DNA  
97 insertion mutant of *AtERF14* increases the susceptibility of Arabidopsis to *Fusarium*  
98 *oxysporum* infection (Oñate-Sánchez, Anderson, Young, & Singh, 2007). *AtERF96*  
99 positively regulates the resistance of Arabidopsis to necrotic pathogens by enhancing  
100 the expression of PDF1.2a, PR-3, PR-4, and ORA59 (Catinot et al., 2015). The  
101 overexpression of *GmERF5* in soybean increases its resistance to *Phytophthora sojae*,  
102 and it can positively regulate the expression of PR genes after being induced by  
103 *Phytophthora sojae* (L. Dong et al., 2015). Zang et al. found that overexpression of  
104 *ZmERF105* can increase the resistance of maize to *S. sphaerocephala*, while the  
105 *erf105* mutant strain showed the opposite phenotype; after *ZmERF105* overexpression  
106 strains were infected with *S. phalacca*, *ZmPR1a*, *ZmPR2*, *ZmPR5*, *ZmPR10.1*. The  
107 expression of disease-related genes such as *ZmPR10.2* is enhanced, on the contrary,  
108 the expression of PR gene is reduced in the ERF105 mutant line (Zang et al., 2020).  
109 Meng et al. cloned two ERF transcription factor members *EREB1* and *EREB2* from  
110 sea island cotton, and *Verticillium dahliae* can induce the expression of these two  
111 genes (Meng et al., 2010). Guo et al. used the SSH method to enrich some  
112 differentially expressed genes related to defense response and cloned the gene  
113 *GbERF1-like* from sea island cotton. The study showed that the overexpression of  
114 *GbERF1-like* activated the synthesis of lignin-related genes, and enhanced cotton and  
115 pseudo-resistance of Arabidopsis to Verticillium wilt (Guo et al., 2016).

116 Here we, cloned *GauERF105* gene from the *G. australe* and then verified the gene  
117 function in cotton via VIGS and overexpression in Arabidopsis in response to VW  
118 attack. This research will provide a basis for further mining of excellent disease  
119 resistance genes in wild cotton, in-depth research on the molecular mechanism of  
120 cotton resistance to Verticillium wilt and provide new genetic resources for cotton  
121 disease resistance breeding.

## 123 **2. Materials and methods**

### 124 **2.1 Plant material, *Verticillium dahliae* strains and gene selection**

125 The Zhongzhimian 2 (disease-resistant upland cotton variety) , Diploid wild cotton  
126 (*G. australe*) and the Colombian ecotype *Arabidopsis* were provided by the Cotton  
127 Research Institute of the Chinese Academy of Agricultural Sciences, Anyang, China.  
128 The cotton seedlings are grown in a growth box with a light/dark cycle of 16/8h and a  
129 temperature of 27°C (day)/23°C (night). The wild-type *Arabidopsis thaliana* (COL-0)  
130 was cultured under a light/dark cycle of 16/8h at a constant temperature of 22°C. The  
131 highly invasive strain of *V. dahliae* (LX2-1) was used for disease resistance  
132 identification, and the preparation of conidia suspension ( $10^7$  conidia mL<sup>-1</sup> for cotton,  
133  $10^6$  and  $10^3$  conidia for *Arabidopsis* ) and inoculation are as described above [1]. From  
134 previously available RNA-Seq data(Q. Dong et al., 2019), we searched all the ERF  
135 family genes and on the basis of expression we selected *GauERF105* for further  
136 experiments.

### 137 **2.2 Gene cloning and Phylogenetic Analysis**

138 RNAprep Pure Plant Plus Kit (TIANGEN BIOTECH, Beijing, China) was used to  
139 extract the sample RNA, and the quality of the sample was checked by agarose gel  
140 electrophoresis and spectrophotometer. TranScript-All-in-One First-Strand cDNA  
141 Synthesis SuperMix (TransGen, Beijing, China) reverse transcription kit was used to  
142 obtain the cDNA. Design primers based on the CDS sequence of *GauERF105*, use *G.*  
143 *australe* cDNA as a template, and use P505 high-fidelity polymerase (Vazyme,  
144 Nanjing, China) to amplify the target gene. Download the amino acid sequences of  
145 other cotton ERF members from the NCBI website. DNAMAN software was used for  
146 multiple sequence alignment, and MEGA-X was used to construct a phylogenetic  
147 tree.

### 148 **2.3 Cotton VIGS and quantification of disease resistance**

149 Virus induced gene silencing (VIGS) was performed according to the procedure  
150 described previously by (Q. Dong et al., 2019). A 432 bp *GhERF105* fragment was  
151 amplified and inserted between the BamHI and EcoRI sites of the tobacco Rattle virus  
152 (TRV) binary vector pTRV2. Phytoene desaturase (PDS) gene was used as a marker

153 to detect the reliability of silencing. These experiments were repeated three times  
154 independently, using more than 35 plants for each treatment. At 25dpi, the seedlings  
155 symptoms are divided into five levels: 0, 1, 2, 3, and 4 according to the symptoms on  
156 the leaves (Z. K. Li et al., 2019). The calculation of Disease index (DI) was as  
157 follows:  $DI = [(\sum \text{disease grades} \times \text{number of infected plants}) / (\text{total number of scored plants} \times 4)]$   
158  $\times 100$  (Cai et al., 2020).

#### 159 **2.4 Generation of transgenic Arabidopsis lines**

160 We used the method of homologous recombination to link the gene with ‘BamHI’ and  
161 ‘SacI’ restriction sites with the overexpression vector PBI121 to obtain the expression  
162 vectorPBI121-GauERF105, which was then transformed into *Agrobacterium*  
163 *tumefaciens* GV3101. Transgenic *Arabidopsis thaliana* plants were obtained using the  
164 flower soaking method (Clough & Bent, 1998). The transgenic lines (T0, T1 and T2  
165 seeds) were screened on half-strength MS medium with kanamycin added. The T3  
166 transgenic lines were identified and characterized by qRT-PCR and then used in  
167 subsequent experiments. The 20-day-old Arabidopsis plants were inoculated with *V.*  
168 *dahliae*. Twenty days after inoculation (20Dpi), the symptoms were scored.  
169 According to the degree of leaf yellowing, the degree of resistance to VW is graded  
170 from 0 to 4. The calculation method of the disease index was kept same as above.

#### 171 **2.5 Histochemical staining of cotton stem lignin**

172 The Wiesner method (Speer, 1987) was used to analyze the lignin histochemical  
173 staining of cotton. The parts of cotton cotyledon nodes of wild-type, TRV: 00 and  
174 TRV: *GhERF105* plants were sectioned by hand. Dip the slices with Wiesner reagent  
175 [3% (w/v) phloroglucinol in dd solution, solubilized with absolute ethanol] for 5  
176 minutes, wash twice with distilled water, acidify with 6% hydrochloric acid solution  
177 for 5 minutes, and wash away residual after hydrochloric acid treatment, place it on a  
178 glass slide to observe and take pictures under a stereo microscope.

#### 179 **2.6 Fungal recovery assay of cotton stems after *V. dahliae* inoculation**

180 We performed the fungal recovery assay as described earlier by (Song & Thomma,  
181 2018). We randomly took cotton plants treated with Verticillium wilt. We used the  
182 stem sections that were above the cotyledons and placed them in a sterilized triangular

183 flask and use disinfectant to disinfect the surface of the cotton stems for 7 minutes and  
184 sterilize them immediately after disinfection. Wash the stem with ddH<sub>2</sub>O, rinse 3  
185 times for 5min each time. Place the samples in a petri dish containing PDA with  
186 cephalosporin and incubate at 25°C in the dark for 3-5 days then observe the fungal  
187 growth.

## 188 **2.7 DAB staining**

189 The 3,3'-diaminobiphenyl (DAB) staining method as described by (Gao et al., 2013)  
190 for estimating the production and accumulation of hydrogen peroxide in the leaves.  
191 After 72 hours of inoculation with *Verticillium dahliae*, Arabidopsis leaves were  
192 taken, rinsed with distilled water, and then dried with filter paper. Add the leaves in a  
193 2mL centrifuge tube, take an appropriate amount of DAB staining solution for  
194 staining, and store in the dark at room temperature for 8h. Remove the staining  
195 solution, add 95% ethanol to remove chlorophyll, keep changing ethanol for 2-3 days.  
196 Use sterilize water to wash the leaves before taking pictures.

## 197 **2.8 Trypan blue staining**

198 The true leaves of the *GauERF105* Arabidopsis experimental group and the wild-type  
199 Arabidopsis WT blank control group were respectively inoculated for 72 hours and  
200 soaked in trypan blue dye solution (10 mL lactic acid, 10 mL glycerin, 10 g phenol,  
201 10 mg Trypan blue, 10 mL of distilled water), in a boiling water bath for 2 minutes,  
202 decolorize in chloral hydrate (2.5 g/mL) after cooling, replace the decolorizing  
203 solution every day, decolorize for 3 days, then wash with sterile water, take pictures  
204 and record.

## 205 **2.9 Expression analysis of defense marker genes**

206 Using cotton and *Arabidopsis thaliana* inoculated with *Verticillium dahliae* as  
207 materials, leaf tissues were obtained at 48hpi and 72hpi respectively, and then quickly  
208 frozen in liquid nitrogen to extract total RNA. These defensive marker genes in  
209 Arabidopsis and cotton were detected using specific primers of some disease-related  
210 proteins (PRs) described by (Guo et al., 2016). Each sample has 3 biological  
211 replicates and 3 technical replicates.

## 212 **2.10 qRT-PCR analysis**



213 According to the above method, the total RNA of the plant was extracted and reverse  
214 transcribed into cDNA. PCR amplification was used SYBR®qPCR Master Mix  
215 (Vazyme, Nanjing, China) The cotton GhUBQ7 gene and the Arabidopsis  
216 AtACTIN gene were used as internal reference genes for qRT-PCR analysis,  
217 Calculate the relative expression of genes according to the  $2^{-\Delta\Delta ct}$  method. The  
218 qRT-PCR assay were performed as described previously

219

220

221

222

### 223 3- Results

#### 224 3.1- Cloning and Sequence Analysis of *GauERF105*

225 Based on already published RNA-seq data (Q. Dong et al., 2019) of *G. australe* under  
 226 *V. dahliae* treatment, we identified all the ERF family genes. On the basis of gene  
 227 expression analysis, we selected a gene namely *GauERF105* for subsequent analysis  
 228 (Figure 1A). The CDS sequence of *GauERF105* consisting of 639bp was  
 229 successfully cloned from the *G. australe*. This gene encodes 213 amino acids with  
 230 theoretical molecular mass of 23.609kD and an isoelectric point of 8.99. *GauERF105*  
 231 was found to be located on chromosome 12 (10153228-10153866). Blastp search on  
 232 NCBI using the protein sequences of *GauERF105* revealed that it has a similarity to  
 233 *Gossypium raimondii* (XP\_01243908.1), *Gossypium arboreum* (XP\_017636134.1),  
 234 *Gossypium hirsutum* (XP\_016721164.1), *Theobroma cacao* (XP\_017873866.1),  
 235 *Herrania umbratical* (XP\_021286001.1), *Hibiscus syriacus* (XP\_039051919.1) and  
 236 *Arabidopsis thaliana* (AT5G51190), and the AP2/ERF domain contains conserved  
 237 YRG and RAYD elements, which may play a key role in DNA binding and protein  
 238 interactions (Figure 1B). Using the CDD website (Marchler-Bauer et al., 2009) to  
 239 predict the conserved domain of *GauERF105*, the results show that the amino acid  
 240 sequence contains a typical AP2 domain at positions 58-125aa (Figure 1C).  
 241 Phylogenetic analysis confirms that *GauERF105* had a high similarity with different  
 242 cotton species but it is more closely related to *Hibiscus syriacus* than *Herrania*  
 243 *umbratical* and *Arabidopsis thaliana* (Figure 1D).

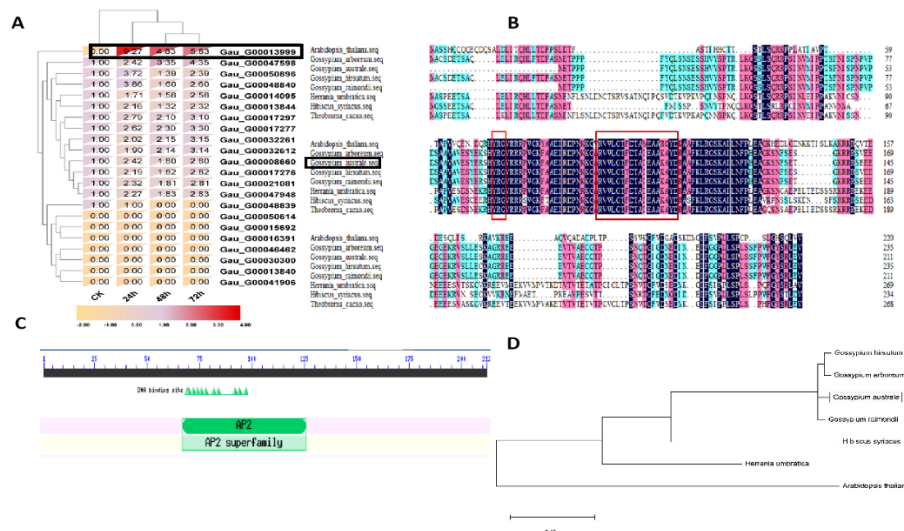

244

245 **Figure 1.** Cloning and Sequence Analysis of *GauERF105* A- Gene structure analysis of *GauERF105*  
246 (*Gau\_G00013999*), B- Multiple sequence alignment of *GauERF105*, C- Prediction of conserved  
247 domain for *GauERF105*, D- Phylogenetic analysis of *GauERF105*

### 248 3.2- Expression analysis of *GauERF105* under *Verticillium dahliae* stress

249 Expression patterns of *GauERF105* have been evaluated in the leaves of *Gossypium*  
250 *australe* at 0h, 3h, 6h, 12h and, 24h after applying *Verticillium dahliae* in order to  
251 confirm the role of selected gene in response to *Verticillium dahliae*. It was observed  
252 that after inoculation, the expression level of *GauERF105* gradually increased from  
253 0h to 24h post inoculation (Figure 4). Highest gene expression was observed at 24h  
254 post inoculation. The results showed that *GauERF105* plays a critical role in response  
255 to *Verticillium dahlia* attack and it might be the key candidate involved in  
256 *Verticillium* wilt resistance.

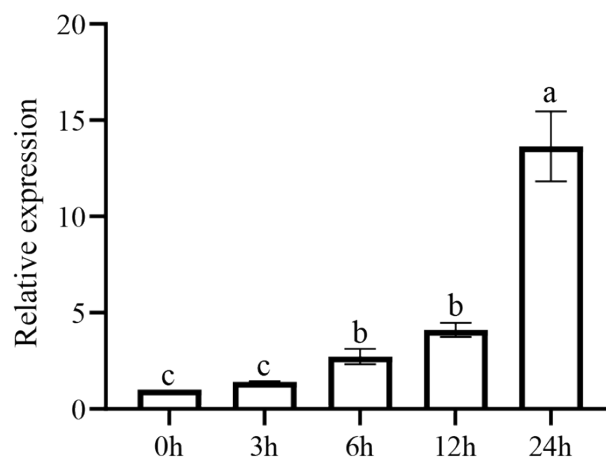

257  
258 **Figure 2:** Expression pattern of *GauERF105* via RT-qPCR at 0, 3, 6, 12 and 24 hours post *Verticillium*  
259 *dahlia* inoculation.

260

### 261 3.3- Overexpression of *GauERF105* enhances the resistance of *Arabidopsis* in 262 response to *Verticillium* wilt attack

263 To validate the role of *GauERF105* in *Verticillium* wilt resistance we constructed an  
264 overexpression vector “PBI121-*GauERF105*” and transform into *Arabidopsis*  
265 *thaliana*. *Arabidopsis thaliana* was infiltrated using floral method. We selected  
266 positive seedlings and screened them on the MS solid medium containing kanamycin  
267 until the T<sub>3</sub> generation where homozygous lines were screened. Samples from eleven

268 positive T<sub>3</sub> generation plants were collected to analyze the expression levels of  
269 *GauERF105*. Based on the results of RT-qPCR and agarose gel electrophoresis, we  
270 selected OE1 and OE2 for subsequent experiments (**Figure 3A, B**).

271 The seeds of OE1 and OE2 lines were spot planted on MS medium, a small  
272 amount of *Verticillium dahliae* was added to MS medium, and the growth of plants  
273 was observed (**Figure 3C**). Results indicated that WT showed a more sensitive  
274 phenotype to *Verticillium dahliae* as compared to the transgenic lines “OE1 and  
275 OE2”. In addition, the degree of WT plants resistance towards verticillium wilt was  
276 higher than that of transgenic lines, which indicates that the overexpression of  
277 *GauERF105* gene enhances the plant's resistance to Verticillium wilt. We also planted  
278 wild-type Arabidopsis and transgenic lines in nutrient soil and observed the symptoms  
279 after inoculation. After overexpressing the *GauERF105* gene in Arabidopsis, the plant  
280 ability to resist Verticillium wilt was significantly enhanced, which is consistent with  
281 the phenotype of Arabidopsis grown on MS plates. The disease index was further  
282 counted by using the formula already mentioned in the methodology section, and a  
283 quantitative experiment of *Verticillium dahliae* was carried out, we observed results  
284 were consistent with that of phenotypic observations (**Figure 3D**).

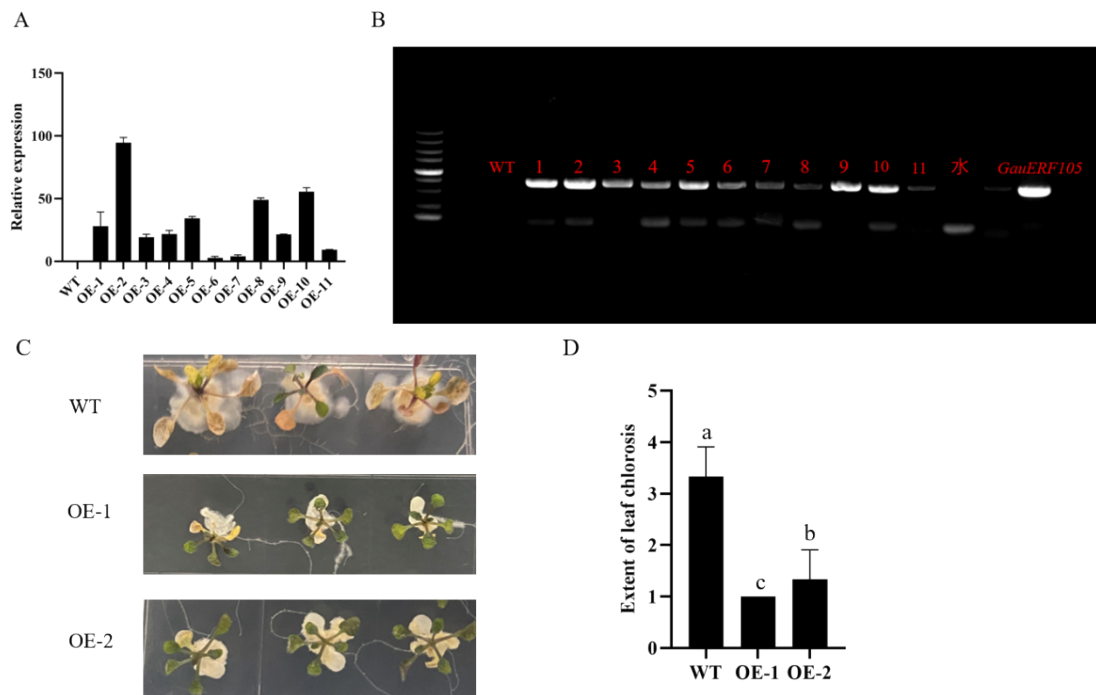

285

286 **Figure 3:** Overexpression of *GauERF105* enhances the resistance of Arabidopsis in response to

287 Verticillium wilt attack **A-** Relative expression of *GauERF105* in the overexpressed lines, **B-**  
288 Polymerase chain reaction (PCR) to confirm 639 bp coding sequence (CDS) integration in  
289 transformed T2 generation, number 1–11 transgenic lines, **C-** Transgenic lines and wild type  
290 under normal and diseased conditions, **D-** Extent of leaf chlorosis in wildtype and overexpressed  
291 lines after fungal inoculation.

### 292 3.4- DAB and trypan blue staining

293 The accumulation of ROS represents the oxidative damage which occurs due to the  
294 stress caused by *Verticillium dahliae* attack. After 72 hours of inoculation leaves were  
295 taken for DAB staining. Wild-type *Arabidopsis* and transgenic lines both started to  
296 accumulate ROS but the leaves of WT plants are affected more as compared to  
297 transgenic lines, indicating that the overexpression of *GauERF105* reduced the  
298 damage caused by *Verticillium dahliae* attack.

299 Due to the damage of *Verticillium dahliae*, a large number of dead cells were  
300 produced in the plants. Therefore, the wild-type plants are stained darker. At the same  
301 time, the staining area of the wild-type *Arabidopsis thaliana* after inoculation was  
302 significantly larger than that of the transgenic *Arabidopsis thaliana*, which indicated  
303 that the damage of *Verticillium dahliae* to plants was greatly reduced after the  
304 *GauERF105* gene was overexpressed **Figure 4**.

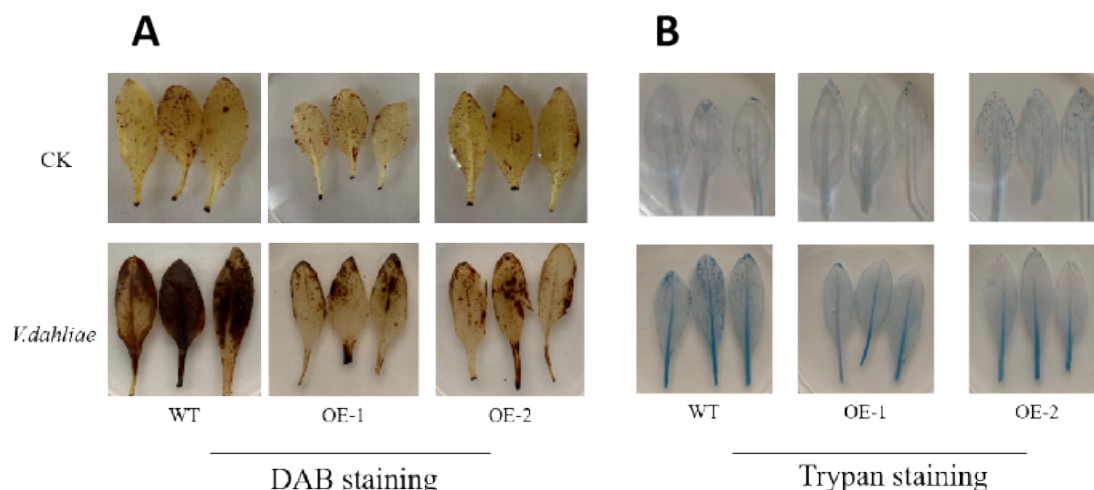

305

306 **Figure 4:** DAB and trypan blue staining **A-** DAB staining to estimate the damage on *Arabidopsis*  
307 leaves after fungal inoculation, **B-** DAB staining to estimate the damage on *Arabidopsis* leaves after  
308 fungal inoculation

309 **3.5- Silencing of *GauERF105* gene decreases the resistance against *Verticillium***  
310 **wilt in cotton**

311 In order to verify the function of *GauERF105* in response to *Verticillium* wilt attack  
312 in cotton, virus-induced gene silencing was used to silence the homologous gene  
313 *GhERF105* in upland cotton (**Figure 5**). About 13 days after VIGS, the cotton leaves  
314 were injected with TRV:PDS bacteria, chlorosis started and an albino phenotype was  
315 observed, which proved that the VIGS system was established successfully and the  
316 results were accurate for further experiment (**Figure 5A**). The qRT-PCR results  
317 showed that the expression level of *GhERF105* gene was significantly lower in  
318 silenced plants as compared to WT and TRV:00, indicating that *GhERF105* gene is  
319 accurately silent.

320 Further, wildtype plants, empty vector plants and silent plants were inoculated with  
321 *Verticillium dahliae*, and the phenotype was observed after 25 days of inoculation  
322 (**Figure 5B**). Compared with the control plants, the leaves of the silent plants turned  
323 yellow, wilted, and even fell off, and the disease index of the silent plants was also  
324 significantly higher. The degree of infection in silent plants was severe as compared  
325 to control plants (**Figure 5C**). In addition, the leaves of WT, TRV:00 and  
326 TRV:GhERF105 plants were quantified for *Verticillium dahliae*. The expression level  
327 of *Verticillium dahliae* in the silenced target gene plants were significantly higher  
328 than that of the control plants, which was consistent with the results of the previous  
329 disease and disease index investigation (**Figure 5D**). We sterilized the cotton stems  
330 after inoculation and cultured them in a PDA solid medium. The number of  
331 *Verticillium dahliae* in the TRV:00 plants were significantly smaller than that of the  
332 TRV:ERF105 plant, indicating that *Verticillium dahliae*. This indicates that silencing  
333 of *GhERF105* gene weakens the plant's resistance to *Verticillium* wilt attack and  
334 make the plant more vulnerable to damage. Cotton lignin dying results showed that  
335 silent plants have inhibition of lignin as compared to wildtype and non-silent plants  
336 (**Figure 5E**). Thus, proving the role of *GhERF105* in VW resistance in cotton.

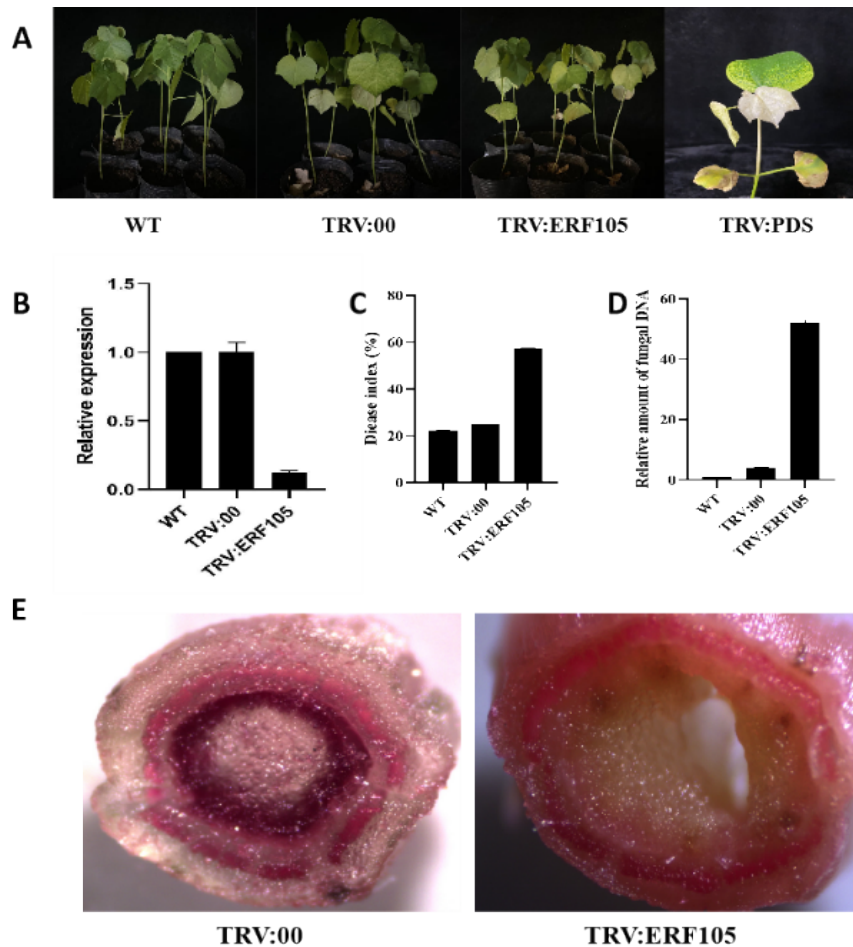

337

338 **Figure 5:** Silencing of *GauERF105* gene decreases the resistance against *Verticillium* wilt in cotton **A-**

339 Representative images of WT, Positive Control, and VIGS plants, **B-** Relative expression of

340 *GhERF105* in WT, TRV:00 and TRV:GhERF105, **C-** Disease index (%) WT, TRV:00 and TRV:

341 GhERF105, **D-** Relative amount of fungal DNA in WT, TRV:00 and TRV:GhERF105, **E-**

342 Histochemical staining of cotton stem lignin. Bars show standard error. WT: Wild type, TRV:00

343 Positive control, TRV:GhERF105, the VIGS plants.

### 344 **3.6- Expression of disease-resistant marker genes in Cotton**

345 In order to further analyze the regulatory role of *GauERF105* gene in the process of

346 plant disease resistance, we further screened the expression of some disease-resistant

347 pathway related genes in Arabidopsis and cotton (**Figure 6 A, B, C**). The results showed

348 that when the plants were inoculated with *Verticillium dahliae*, the expression of PRs

349 increased; the expression of *AtPDF1.2*, *AtPR3* and *AtPR4* genes in the two

350 *GauERF105* gene-transformed transgene lines OE-1 and OE-2 lines was significantly

351 higher than that in the wildtype. In VIGS plants, the expression of PRs genes in the

352 silenced plants was significantly downregulated. It further illustrates that the  
353 *GauERF105* gene can activate hormone-related pathways to participate in plant  
354 disease resistance (Figure 6 D, E, F).

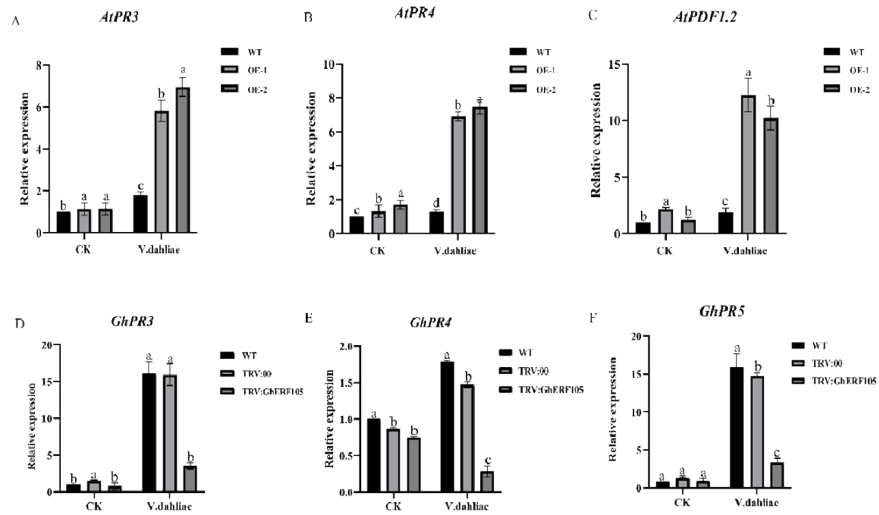

355

356 **Figure 6:** Expression of disease resistant marker genes in Transgenic Arabidopsis and Cotton.



#### 357 **4- Discussion**

358 Plants opt a series of defense mechanisms after being invaded by pathogens. As one  
359 of the largest transcription factor families in plants, ERFs participate in the regulation  
360 of plant disease resistance.

361 ERF transcription factors positively activate the expression of genes related to plant  
362 resistance to pathogens or regulate the accumulation of some secondary metabolites in  
363 plants, thereby enhancing resistance to pests and diseases (SHAO, SHI, ZHANG, &  
364 LANG, 2021). In the interaction network of plant immune response, SA and JA/ET  
365 have cross-effects (Guo et al., 2016). Studies have shown that the SA pathway is  
366 involved in regulating the defense of plants against living vegetative pathogens, and  
367 JA and ET signal transduction are considered to be effective against pathogen attack.  
368 Necrotrophic pathogens such as *B. cinerea* and *F. oxysporum* are more effective  
369 (Derksen, Rampitsch, & Daayf, 2013). In this study, the *GauERF105* gene was  
370 screened and cloned from *G. australe*. Here we overexpressed *GauERF105* in  
371 Arabidopsis and checked the expression levels of AtPR3, AtPR4 and AtPDF1.2 genes  
372 in the transgenic lines OE-1 and OE-2. We observed that, the expressions were  
373 significantly higher in transgene lines as compared to wild-type Arabidopsis (**Figure**  
374 **3**), which shows that when the expression level of *GauERF105* gene increases, the  
375 expression level of its downstream genes also increases; DAB staining results show  
376 that the staining degree of *GauERF105* in transgenic Arabidopsis leaves is lighter  
377 than that of wild-type Arabidopsis. These result shows that overexpression of the  
378 *GauERF105* gene reduces the oxidative damage of pathogens to plants and improves  
379 the resistance of Arabidopsis against Verticillium wilt. PR1 and PR5 are the  
380 downstream genes of the SA pathway, and PR3 and PR4 are the downstream genes of  
381 the ET/JA pathway. The promoter regions of these disease related proteins have  
382 GCC-box. ERF transcription factors activate the expression of downstream defense  
383 genes by binding to GCC-box. So, as to enhance the plant's resistance to diseases and  
384 insects attacks. After overexpression of the potato *StERF94* transcription factor, the  
385 expression of PRs-related genes increased, thereby enhancing the potato's resistance  
386 to *Fusarium oxysporum* (Charfeddine, Samet, Charfeddine, Bouaziz, & Bouzid,

387 2019). Wang et al. (Wang, Liu, & Wang, 2020) overexpressed the *VqERF112*,  
388 *VqERF114* and *VqERF072* genes in *Arabidopsis*, and activated the SA signal-related  
389 genes *AtNPR1* and *AtPR1* and JA/ET signal-related genes *AtPDF1.2*, *AtLOX3*,  
390 *AtPR3* and *AtPR4*, thereby enhancing the expression of *Arabidopsis* resistance to  
391 *Pst-DC3000* and *B. cinerea*.

392 We used VIGS to verify the role of *GauERF105* homologous gene *GhERF105* in  
393 upland cotton in the disease-resistant variety Zhongzhimian No. 2, after inoculation  
394 with *Verticillium dahliae*. The silent plants turned yellow, wilted, or even died,  
395 compared with the control plants. After silencing *GauERF105* gene, plants are more  
396 sensitive to *Verticillium* wilt (**Figure 5**). Cotton disease index survey (**Figure 5C**),  
397 lignin staining (**Figure 5E**), *Verticillium dahliae* recovery culture, and quantitative  
398 experiment of *Verticillium dahliae* (**Figure 5D**) showed that the silencing of  
399 *GauERF105* gene, weaken the defense ability of plants against pathogens. Compared  
400 with the control, the expressions of *GhPR3*, *GhPR4* and *GhPR5* were significantly  
401 downregulated in the silent plants (**Figure 6 D, E, F**), which indicated that when the  
402 expression of *GhERF105* gene was interfered, the expression of its downstream genes  
403 was inhibited, which weakened the plant's disease resistance. Compared with  
404 non-inoculated plants, the expression levels of disease-related protein genes in cotton  
405 or *Arabidopsis thaliana* were increased, indicating that the plants activated SA,  
406 ET/JA, and other hormone transmission pathways after being subjected to biological  
407 stress. , In order to participate in the defense response of plants.

408 The above results indicate that *GauERF105* acts as a positive regulator of plant  
409 *Verticillium* wilt resistance in both the model plant *Arabidopsis* and cotton.

410

411 **4- Conclusions:**

412 Verticillium wilt attack on cotton are very severe in China and results in more  
413 and more yield loss every year. Therefore, it is an utmost requirement to have  
414 disease resistant cotton varieties. For that purpose, we need the candidate  
415 genes responsible for disease resistant especially VW in cotton. Here, we  
416 selected and screened that *GauERF105* gene from *Gossypium Australe* in  
417 order to verify its potential role against verticillium wilt attack in cotton and  
418 Arabidopsis. We performed overexpression experiments in Arabidopsis and  
419 VIGS in cotton. Our results indicated that overexpression of *GauERF105*  
420 increases the disease resistance ability in Arabidopsis and by silencing  
421 *GauERF105*, results in a decrease in defense and resistance. RT-qPCR,  
422 Trypan blue, DAB and lignin staining also validates our findings and hence it  
423 is proved that *GauERF105* is a truer candidate gene for resistance against VW  
424 attack in cotton. This gene can be used for further breeding programs to create  
425 the disease resistance against VW attack.

426

427 **Authors' statement**

428 W.Y.Q, M.J.U, and Y.X conducted the experiment and wrote the manuscript.  
429 R. O. M, T.G.M and M. L.S, Z.J assisted in data analysis. K.W., X.C, YH,  
430 YW, Z.Z., and F.L. revised the manuscript. All authors reviewed and approved  
431 the final manuscript.

432 **Acknowledgments**

433 We are very much thankful to the Institute of Cotton Research, Chinese  
434 Academy of Agricultural Sciences and to our laboratory for providing the full  
435 supply and support during the experiment.

436 **Conflict of Interest**

437 The authors declared that they have no competing interests

438 **Funding**

439 This research was funded by the National Natural Science Foundation of  
440 China (32072023, 32171994), The National Key R&D Program of China  
441 (2021YFE0101200), Central Public-interest Scientific Institution Basal  
442 Research Fund (1610162021017, 16101620201050, 1610162021039),  
443 Postgraduate Improvement Project of Henan Province (YJS2022JD47).

444

445

## 446 **References:**

- 447 Barbara, D. (2003). *Verticillium Wilts*-GF Pegg and BL Brady; CABI Publishing, CAB International,  
448 Wallingford, Oxon OX10 8DE, UK & 10 East 40th Street, Suite 3203, New York, NY 10016,  
449 USA, 552 pages. ISBN 0 85199 529 2. *Physiological and Molecular Plant Pathology*, 1(62),  
450 51-52.
- 451 Beasley, J. (1942). Meiotic chromosome behavior in species, species hybrids, haploids, and induced  
452 polyploids of *Gossypium*. *Genetics*, 27(1), 25.
- 453 Berrocal - Lobo, M., Molina, A., & Solano, R. (2002). Constitutive expression of ETHYLENE -  
454 RESPONSE - FACTOR1 in *Arabidopsis* confers resistance to several necrotrophic fungi. *The*  
455 *Plant Journal*, 29(1), 23-32.
- 456 Cai, Y., Cai, X., Wang, Q., Wang, P., Zhang, Y., Cai, C., . . . Wang, C. (2020). Genome sequencing of the  
457 Australian wild diploid species *Gossypium australe* highlights disease resistance and delayed  
458 gland morphogenesis. *Plant Biotechnology Journal*, 18(3), 814-828.
- 459 Cai, Y., Xiaohong, H., Mo, J., Sun, Q., Yang, J., & Liu, J. (2009). Molecular research and genetic  
460 engineering of resistance to *Verticillium* wilt in cotton: a review. *African journal of*  
461 *Biotechnology*, 8(25).
- 462 Catinot, J., Huang, J. B., Huang, P. Y., Tseng, M. Y., Chen, Y. L., Gu, S. Y., . . . Zimmerli, L. (2015).  
463 ETHYLENE RESPONSE FACTOR 96 positively regulates *A. rabiidopsis* resistance to necrotrophic  
464 pathogens by direct binding to GCC elements of jasmonate - and ethylene - responsive  
465 defence genes. *Plant, cell & environment*, 38(12), 2721-2734.
- 466 Charfeddine, M., Samet, M., Charfeddine, S., Bouaziz, D., & Bouzid, R. G. (2019). Ectopic expression of  
467 StERF94 transcription factor in potato plants improved resistance to *Fusarium solani*  
468 infection. *Plant molecular biology reporter*, 37(5), 450-463.
- 469 Chen, P., Lee, B., & Robb, J. (2004). Tolerance to a non-host isolate of *Verticillium dahliae* in tomato.  
470 *Physiological and Molecular Plant Pathology*, 64(6), 283-291.
- 471 Clough, S. J., & Bent, A. F. (1998). Floral dip: a simplified method for *Agrobacterium* - mediated  
472 transformation of *Arabidopsis thaliana*. *The Plant Journal*, 16(6), 735-743.
- 473 Derksen, H., Rampitsch, C., & Daayf, F. (2013). Signaling cross-talk in plant disease resistance. *Plant*  
474 *Science*, 207, 79-87.
- 475 Dong, L., Cheng, Y., Wu, J., Cheng, Q., Li, W., Fan, S., . . . Zhang, D. (2015). Overexpression of GmERF5,  
476 a new member of the soybean EAR motif-containing ERF transcription factor, enhances  
477 resistance to *Phytophthora sojae* in soybean. *Journal of experimental botany*, 66(9),  
478 2635-2647.
- 479 Dong, Q., Magwanga, R. O., Cai, X., Lu, P., Nyangasi Kirungu, J., Zhou, Z., . . . Hou, Y. (2019).  
480 RNA-sequencing, physiological and RNAi analyses provide insights into the response  
481 mechanism of the ABC-mediated resistance to *Verticillium dahliae* infection in cotton. *Genes*,  
482 10(2), 110.
- 483 Fryxell, P. A. (1992). A revised taxonomic interpretation of *Gossypium* L.(Malvaceae). *Rheedea*, 2(2),  
484 108-165.
- 485 Fujimoto, S. Y., Ohta, M., Usui, A., Shinshi, H., & Ohme-Takagi, M. (2000). *Arabidopsis*  
486 ethylene-responsive element binding factors act as transcriptional activators or repressors of  
487 GCC box-mediated gene expression. *The Plant Cell*, 12(3), 393-404.
- 488 Gao, X., Li, F., Li, M., Kianinejad, A. S., Dever, J. K., Wheeler, T. A., . . . Shan, L. (2013). Cotton Gh BAK 1

- 489 Mediates Verticillium Wilt Resistance and Cell Death. *Journal of integrative plant biology*,  
490 55(7), 586-596.
- 491 Gong, Q., Yang, Z., Wang, X., Butt, H. I., Chen, E., He, S., . . . Li, F. (2017). Salicylic acid-related cotton  
492 (*Gossypium arboreum*) ribosomal protein GaRPL18 contributes to resistance to *Verticillium*  
493 *dahliae*. *BMC plant biology*, 17(1), 1-15.
- 494 Guo, W., Jin, L., Miao, Y., He, X., Hu, Q., Guo, K., . . . Zhang, X. (2016). An ethylene response-related  
495 factor, GbERF1-like, from *Gossypium barbadense* improves resistance to *Verticillium dahliae*  
496 via activating lignin synthesis. *Plant molecular biology*, 91(3), 305-318.
- 497 Jian, G., Lu, M., Xiu, J., Wang, F., & Zhang, H. (2004). Control strategy of *Verticillium dahliae* in cotton.  
498 *China Plant Protection*, 24(4), 30-31.
- 499 Kizis, D., & Pagès, M. (2002). Maize DRE - binding proteins DBF1 and DBF2 are involved in rab17  
500 regulation through the drought - responsive element in an ABA - dependent pathway. *The*  
501 *Plant Journal*, 30(6), 679-689.
- 502 Kunbo, W., Wendel, J. F., & Jinping, H. (2018). Designations for individual genomes and chromosomes  
503 in *Gossypium*. *Journal of Cotton Research*, 1(1), 1-5.
- 504 Li, T., Zhang, Q., Jiang, X., Li, R., & Dhar, N. (2021). Cotton CC-NBS-LRR Gene GbCNL130 Confers  
505 Resistance to *Verticillium Wilt* Across Different Species. *Frontiers in Plant Science*, 1904.
- 506 Li, Z. K., Chen, B., Li, X. X., Wang, J. P., Zhang, Y., Wang, X. F., . . . Wu, J. H. (2019). A newly identified  
507 cluster of glutathione S - transferase genes provides *Verticillium wilt* resistance in cotton.  
508 *The Plant Journal*, 98(2), 213-227.
- 509 Ligoxigakis, E., Vakalounakis, D., & Thanassouloupoulos, C. (2002). Weed hosts of *Verticillium dahliae* in  
510 Crete: Susceptibility, symptomatology and significance. *Phytoparasitica*, 30(5), 511-518.
- 511 Lorenzo, O., Piqueras, R., Sánchez-Serrano, J. J., & Solano, R. (2003). ETHYLENE RESPONSE FACTOR1  
512 integrates signals from ethylene and jasmonate pathways in plant defense. *The Plant Cell*,  
513 15(1), 165-178.
- 514 Marchler-Bauer, A., Anderson, J. B., Chitsaz, F., Derbyshire, M. K., DeWeese-Scott, C., Fong, J. H., . . .  
515 Gwadz, M. (2009). CDD: specific functional annotation with the Conserved Domain Database.  
516 *Nucleic acids research*, 37(suppl\_1), D205-D210.
- 517 Meng, X., Li, F., Liu, C., Zhang, C., Wu, Z., & Chen, Y. (2010). Isolation and characterization of an ERF  
518 transcription factor gene from cotton (*Gossypium barbadense* L.). *Plant molecular biology*  
519 *reporter*, 28(1), 176-183.
- 520 Mohamed, H. I., & Akladios, S. A. (2017). Changes in antioxidants potential, secondary metabolites  
521 and plant hormones induced by different fungicides treatment in cotton plants. *Pesticide*  
522 *Biochemistry and Physiology*, 142, 117-122.
- 523 Oñate-Sánchez, L., Anderson, J. P., Young, J., & Singh, K. B. (2007). AtERF14, a member of the ERF  
524 family of transcription factors, plays a nonredundant role in plant defense. *Plant Physiology*,  
525 143(1), 400-409.
- 526 Phillips, L. L. (1966). The cytology and phylogenetics of the diploid species of *Gossypium*. *American*  
527 *Journal of Botany*, 53(4), 328-335.
- 528 SHAO, W.-j., SHI, J., ZHANG, P., & LANG, M.-l. (2021). Research Progress of ERF Transcription Factors  
529 in Regulating Biological Stress Responses. *Biotechnology Bulletin*, 37(3), 136.
- 530 Song, Y., & Thomma, B. P. (2018). Host - induced gene silencing compromises *Verticillium wilt* in  
531 tomato and *Arabidopsis*. *Molecular plant pathology*, 19(1), 77-89.
- 532 Speer, E. (1987). A method of retaining phloroglucinol proof of lignin. *Stain Technology*, 62(4),

- 533           279-280.
- 534 Stockinger, E. J., Gilmour, S. J., & Thomashow, M. F. (1997). *Arabidopsis thaliana* CBF1 encodes an AP2  
535 domain-containing transcriptional activator that binds to the C-repeat/DRE, a cis-acting DNA  
536 regulatory element that stimulates transcription in response to low temperature and water  
537 deficit. *Proceedings of the National Academy of Sciences*, *94*(3), 1035-1040.
- 538 Wang, L., Liu, W., & Wang, Y. (2020). Heterologous expression of Chinese wild grapevine VqERFs in  
539 *Arabidopsis thaliana* enhance resistance to *Pseudomonas syringae* pv. tomato DC3000 and to  
540 *Botrytis cinerea*. *Plant Science*, *293*, 110421.
- 541 Wei, Z., & Yu, D. (2018). Analysis of the succession of structure of the bacteria community in soil from  
542 long-term continuous cotton cropping in Xinjiang using high-throughput sequencing. *Archives*  
543 *of microbiology*, *200*(4), 653-662.
- 544 Yang, C., Lu, X., Ma, B., Chen, S.-Y., & Zhang, J.-S. (2015). Ethylene signaling in rice and *Arabidopsis*:  
545 conserved and diverged aspects. *Molecular plant*, *8*(4), 495-505.
- 546 Yang, H.-J., Shen, H., Chen, L., Xing, Y.-Y., Wang, Z.-Y., Zhang, J.-L., & Hong, M.-M. (2002). The  
547 OsEBP-89 gene of rice encodes a putative EREBP transcription factor and is temporally  
548 expressed in developing endosperm and intercalary meristem. *Plant molecular biology*,  
549 *50*(3), 379-391.
- 550 Yinhu, J., Xiwen, W., Junling, S., Zhongli, Z., Zaoe, P., Shoupu, H., . . . Xiongming, D. (2014).  
551 Association mapping of resistance to *Verticillium* wilt in *Gossypium hirsutum* L. germplasm.  
552 *African journal of Biotechnology*, *13*(31).
- 553 Zang, Z., Lv, Y., Liu, S., Yang, W., Ci, J., Ren, X., . . . Jiang, L. (2020). A novel ERF transcription factor,  
554 ZmERF105, positively regulates maize resistance to *Exserohilum turcicum*. *Frontiers in Plant*  
555 *Science*, *11*, 850.
- 556 Zeng, H., Chen, R., Luo, X., & Tian, J. (2016). Isolation and anti-*Verticillium dahliae* activity from  
557 *Bacillus axarquiensis* TUBP1 protein. *Process Biochemistry*, *51*(10), 1691-1698.
- 558

**A**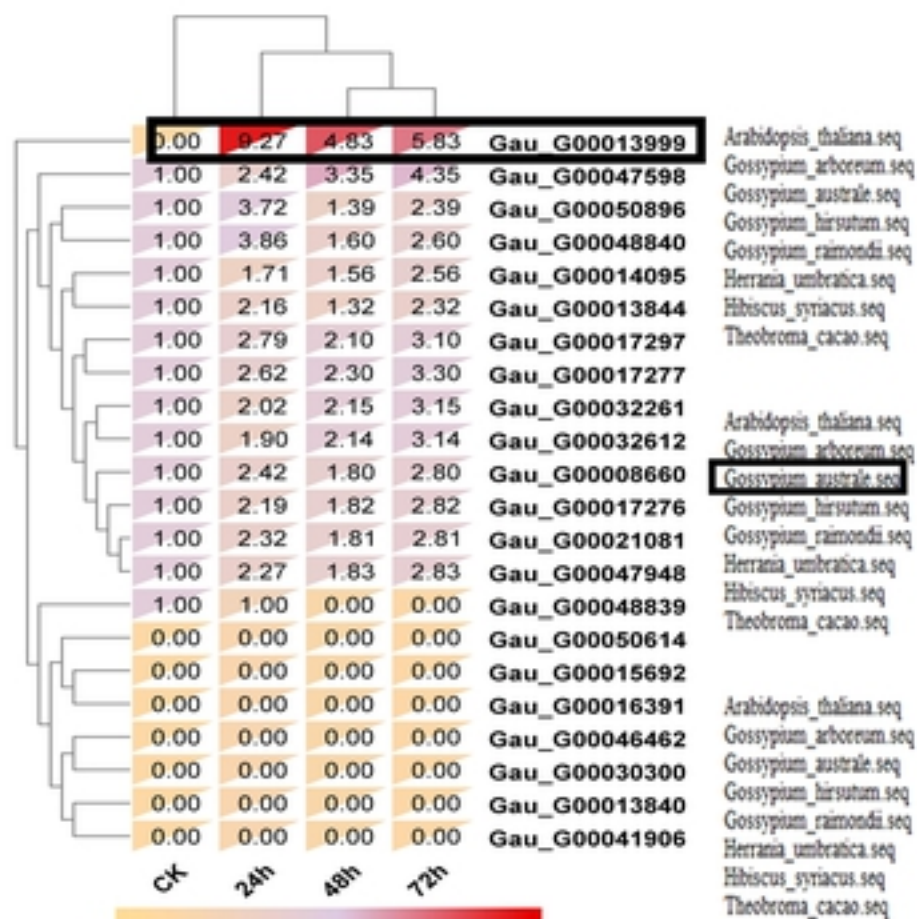**B**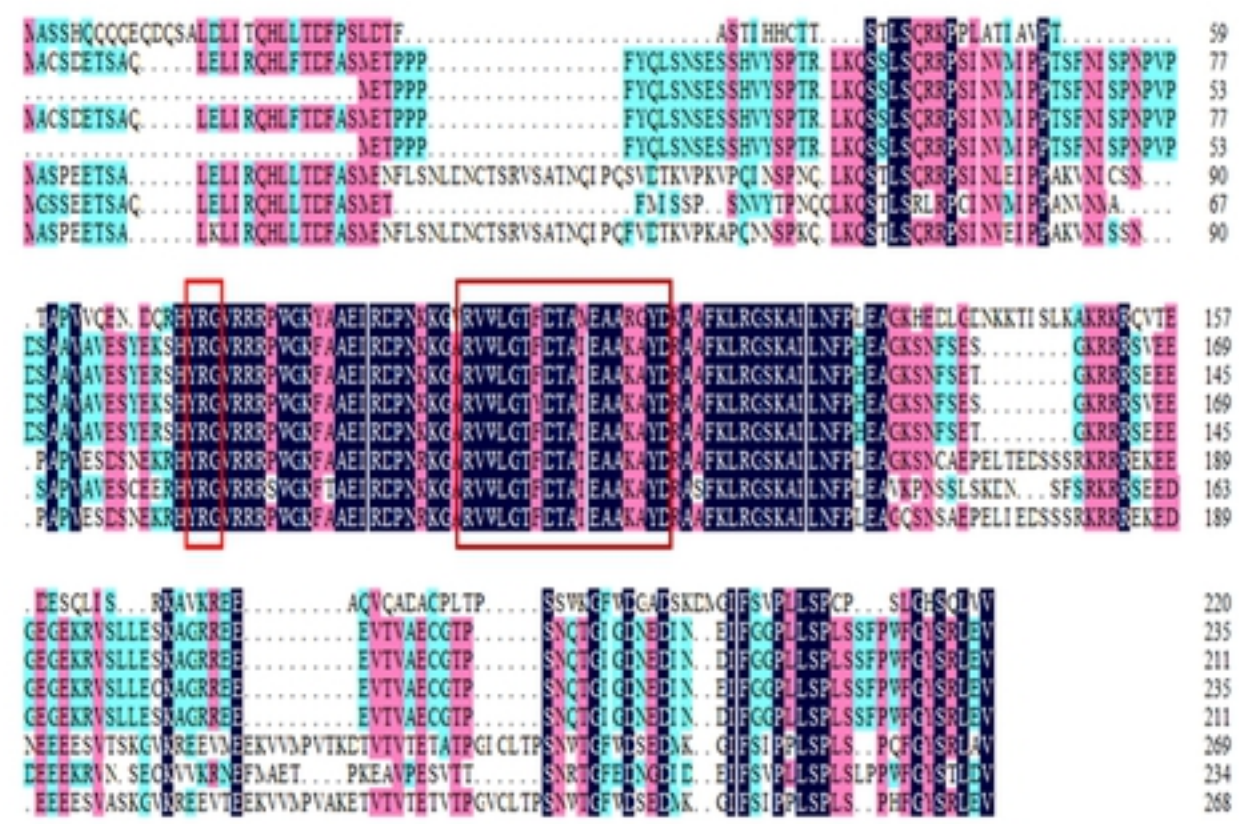**C**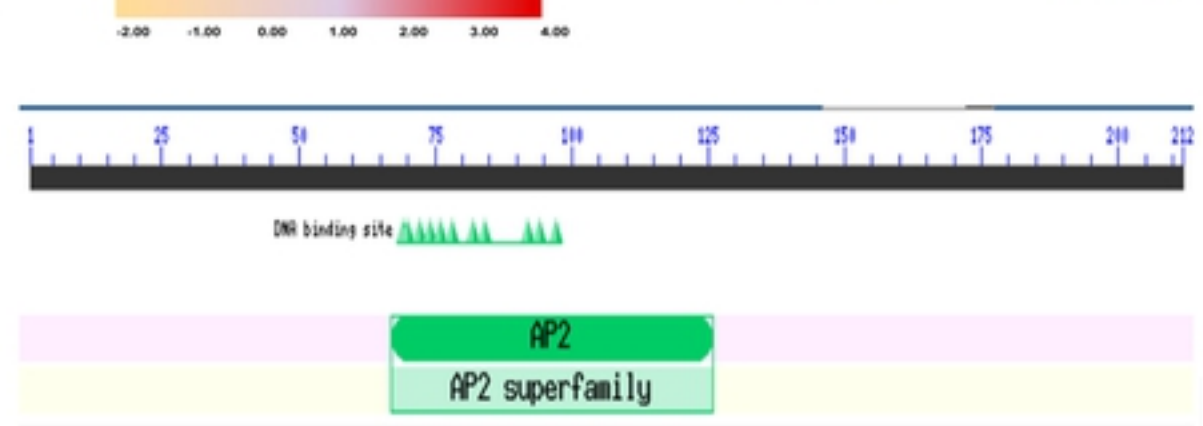**D**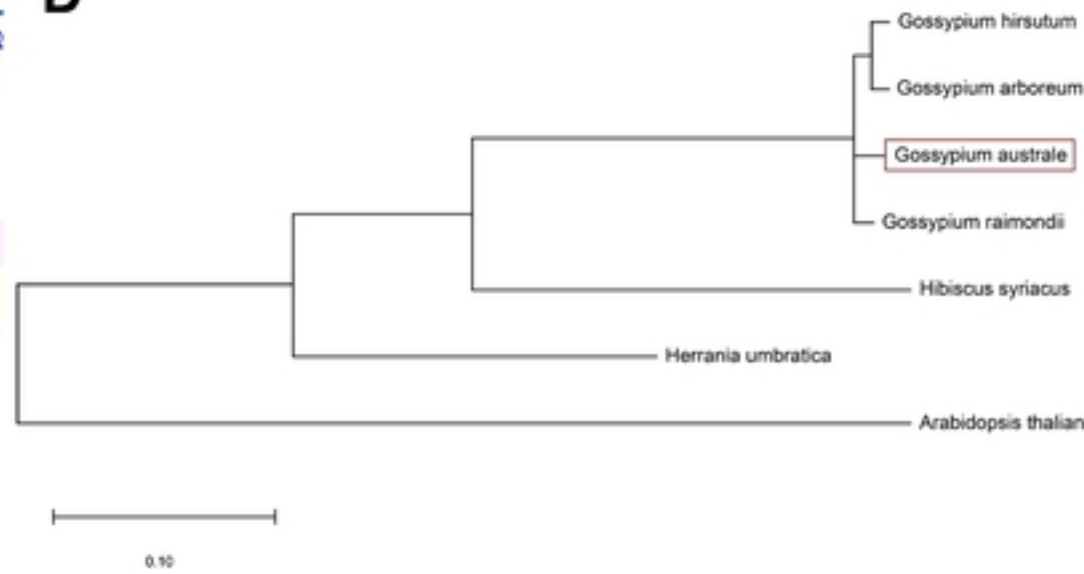

Figure 1



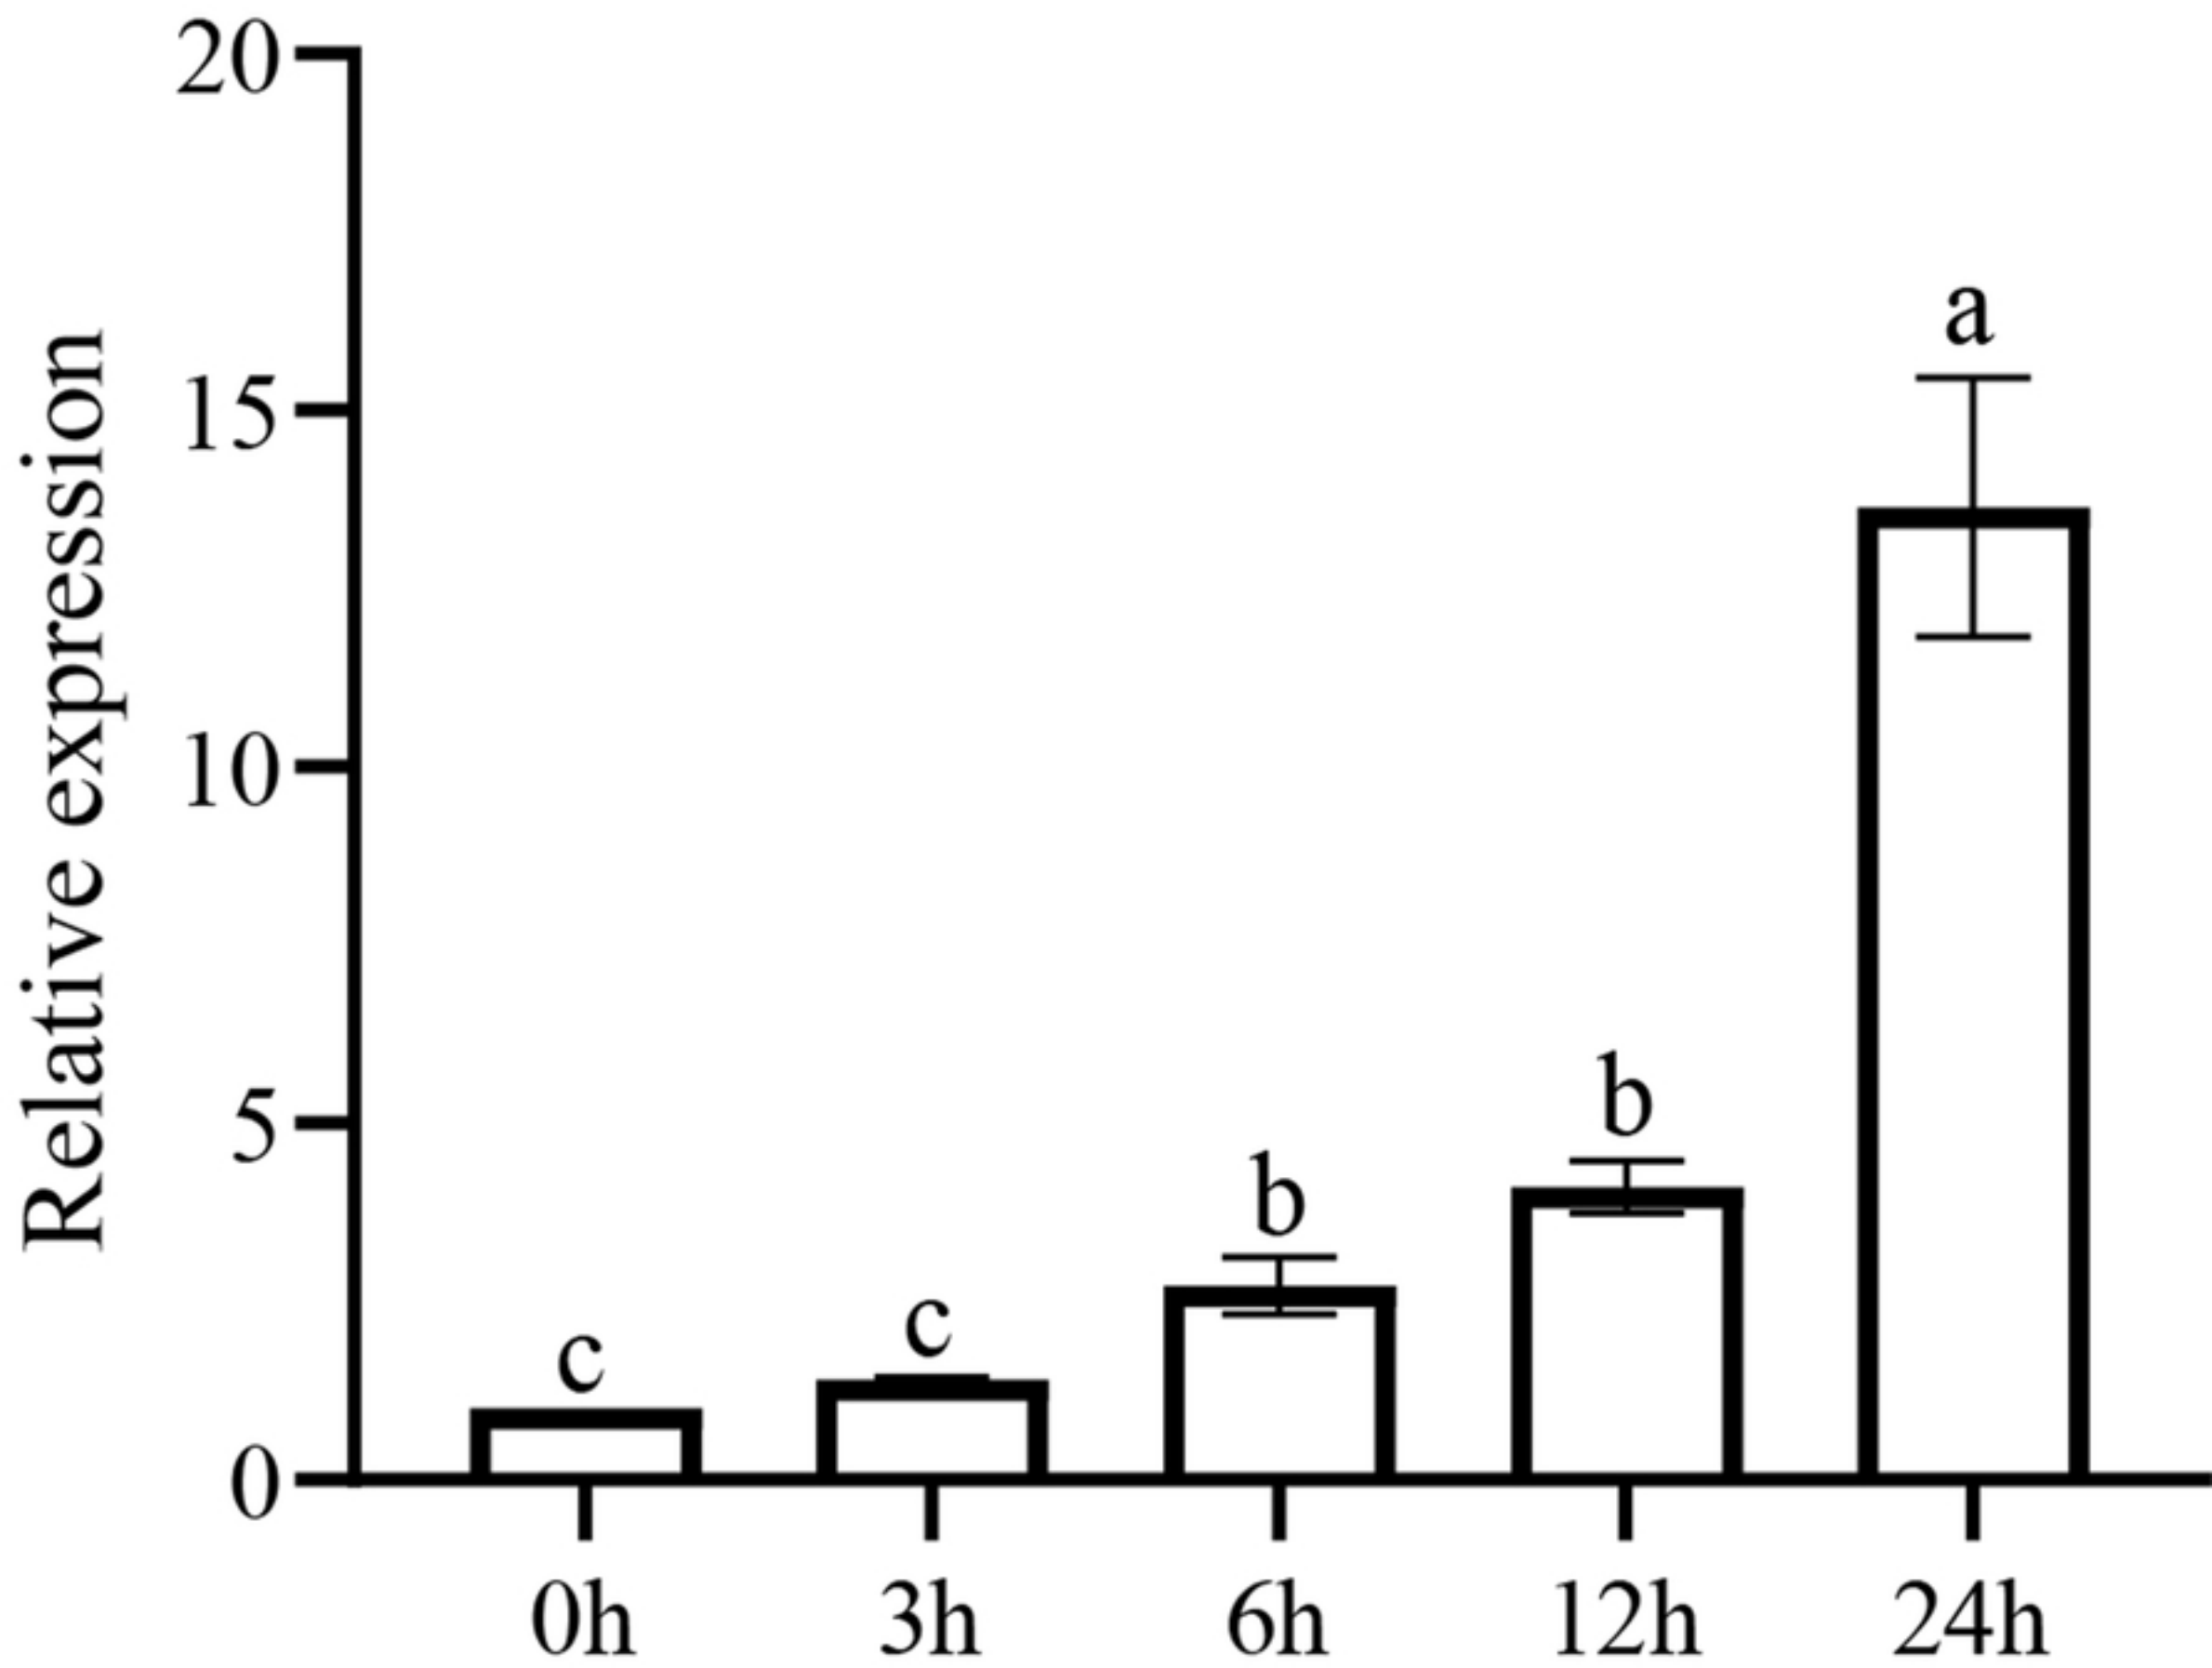

Figure 2

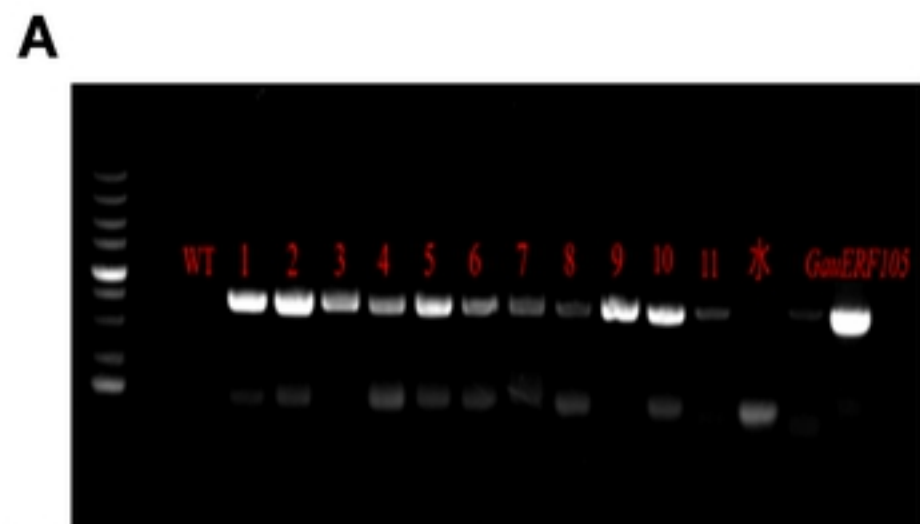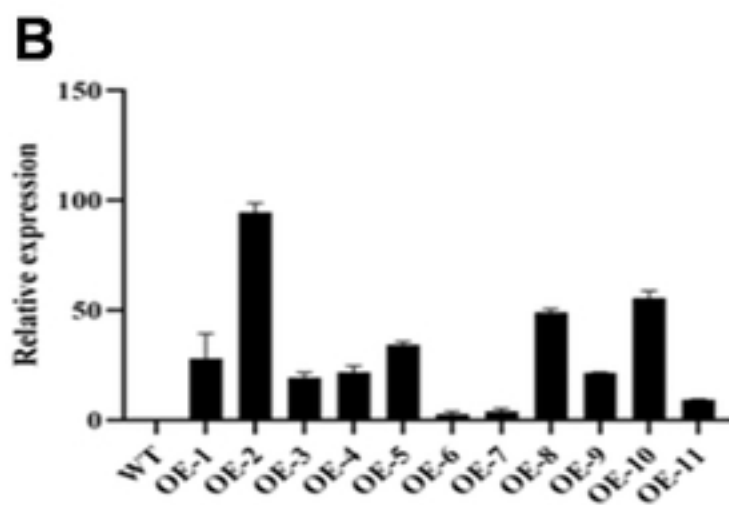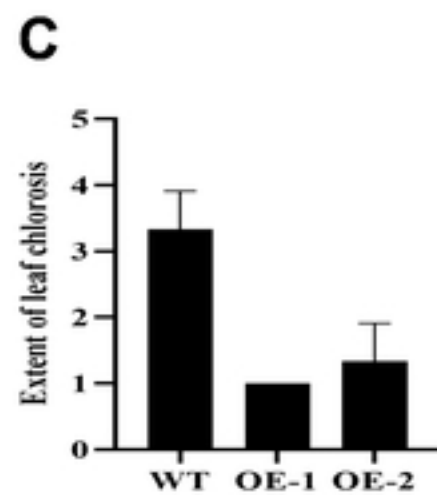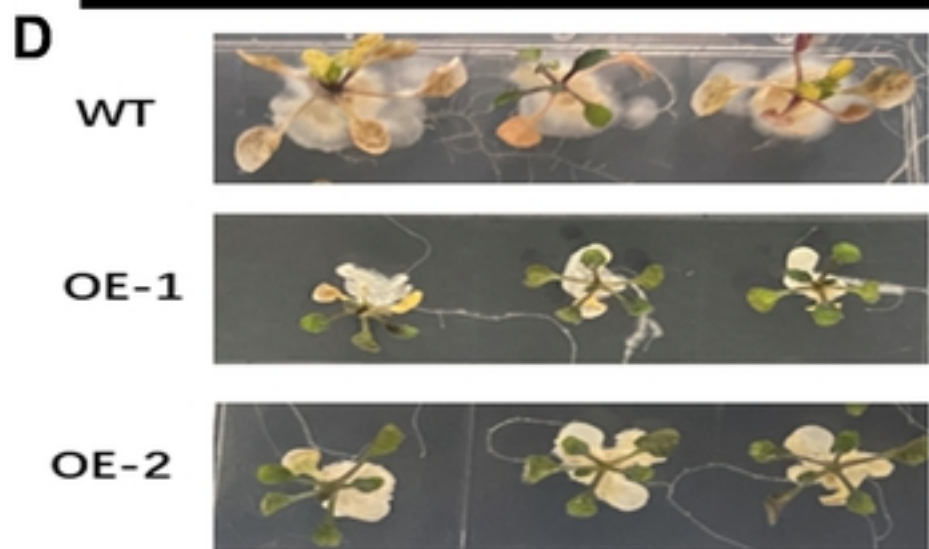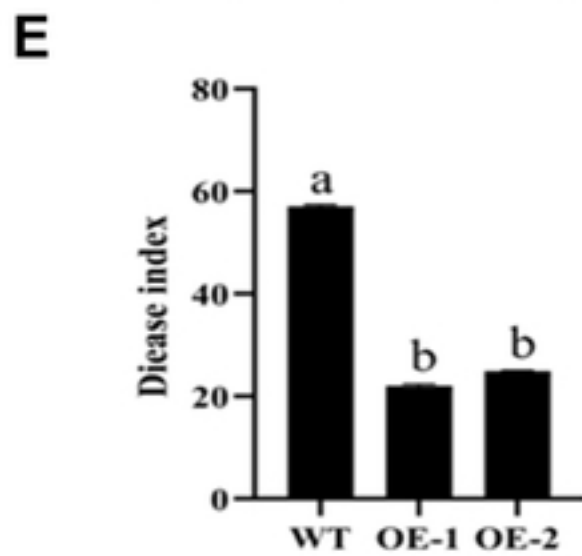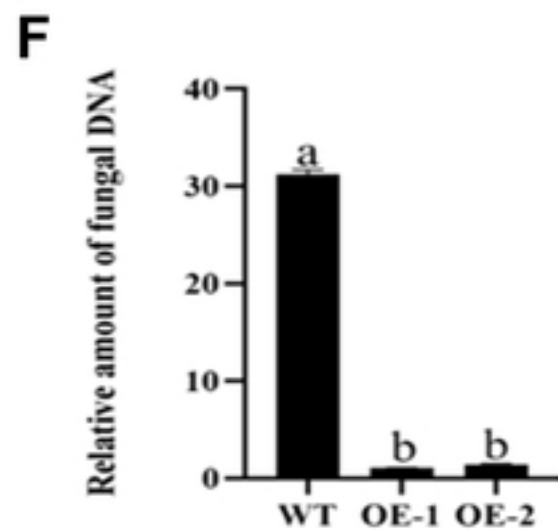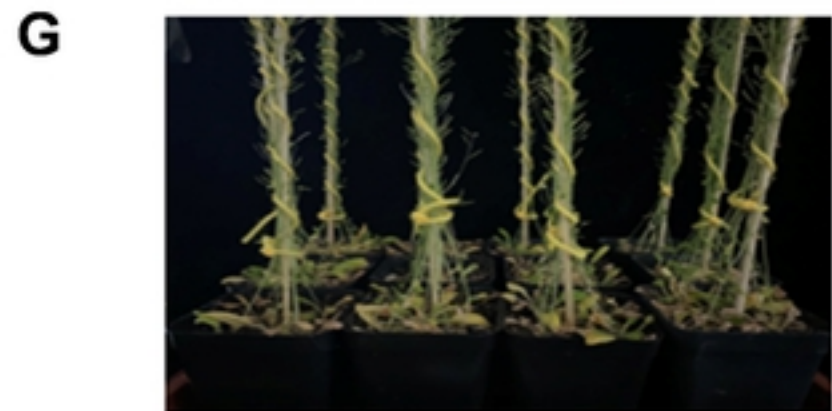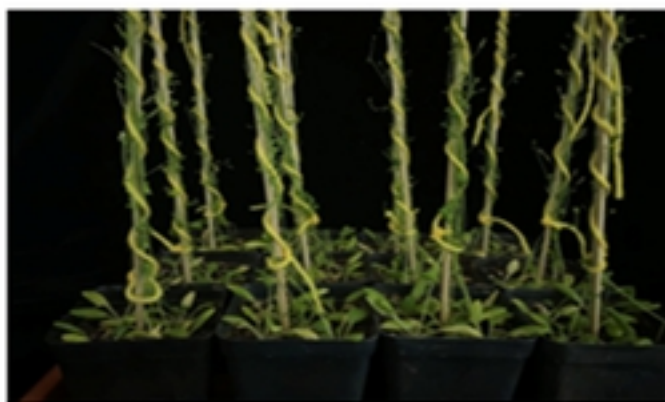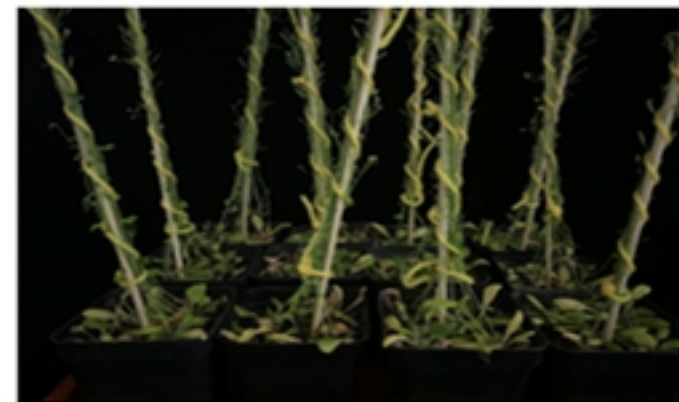

WT

OE-1

OE-2

Figure 3

**A****B**

CK

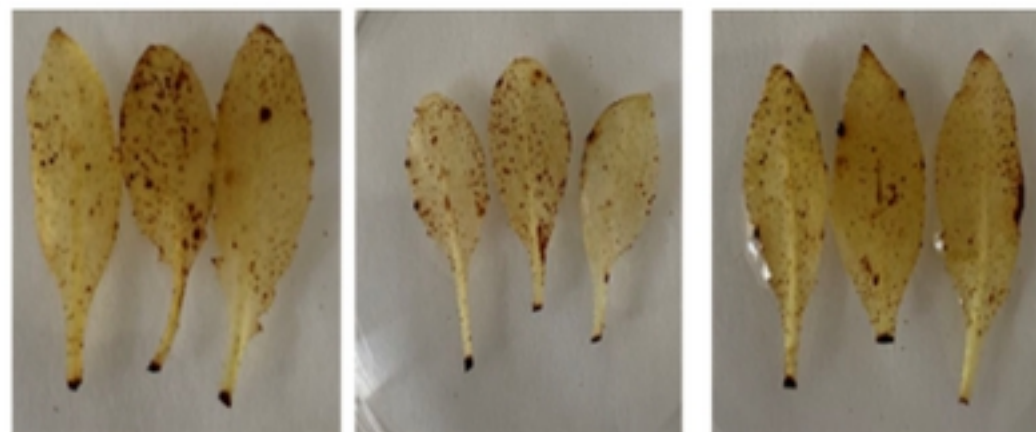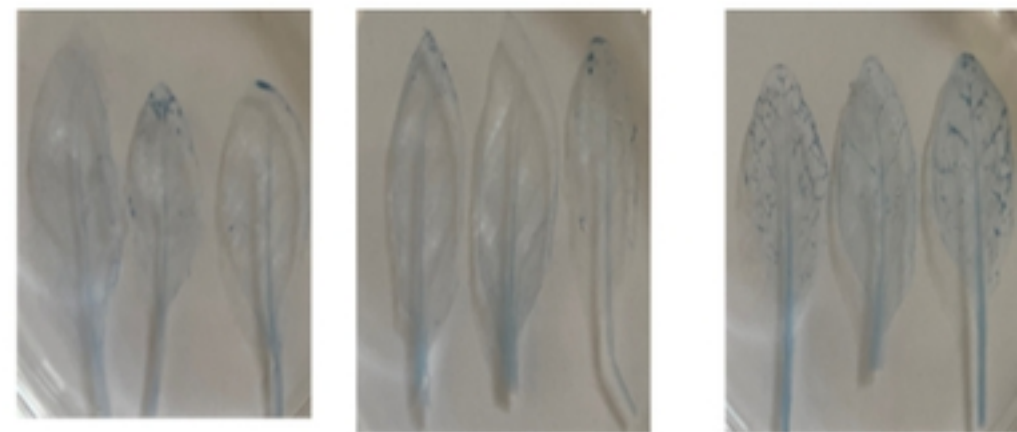*V.dahliae*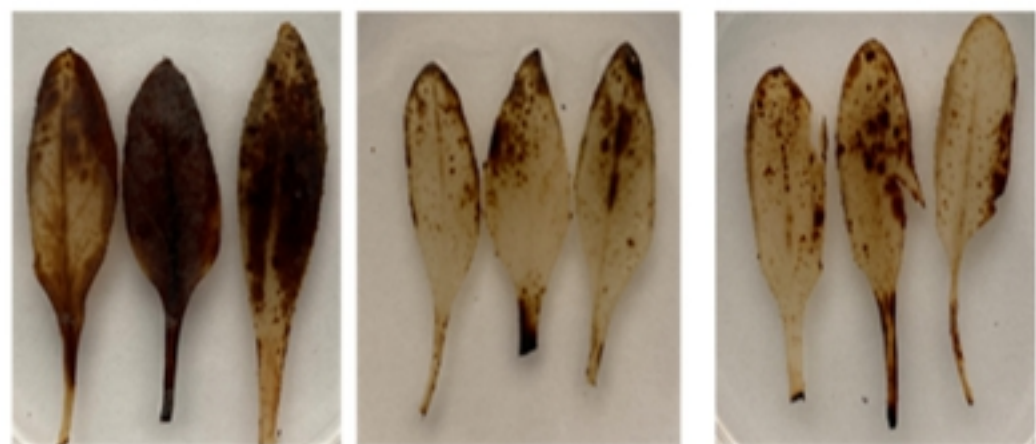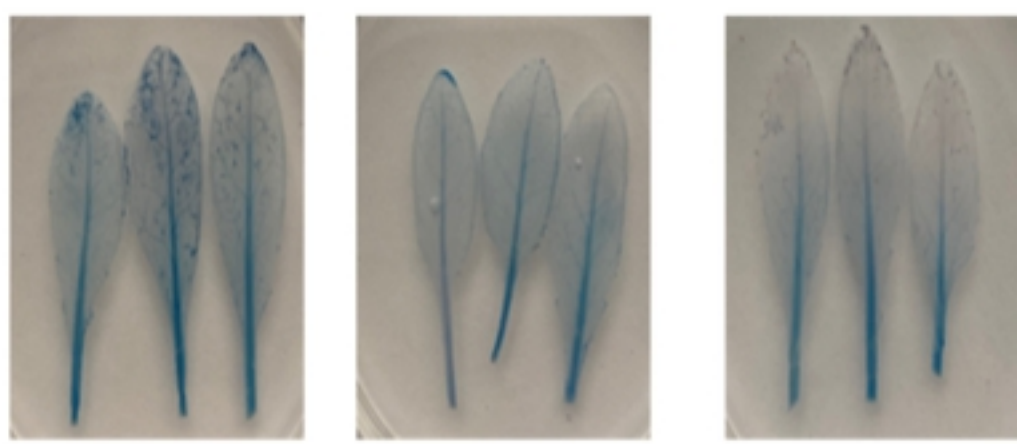

WT

OE-1

OE-2

WT

OE-1

OE-2

DAB staining

Trypan staining

Figure 4

**A**

bioRxiv preprint doi: <https://doi.org/10.1101/2021.12.30.474616>; this version posted January 11, 2022. The copyright holder for this preprint (which was not certified by peer review) is the author/funder, who has granted bioRxiv a license to display the preprint in perpetuity. It is made available under aCC-BY 4.0 International license.

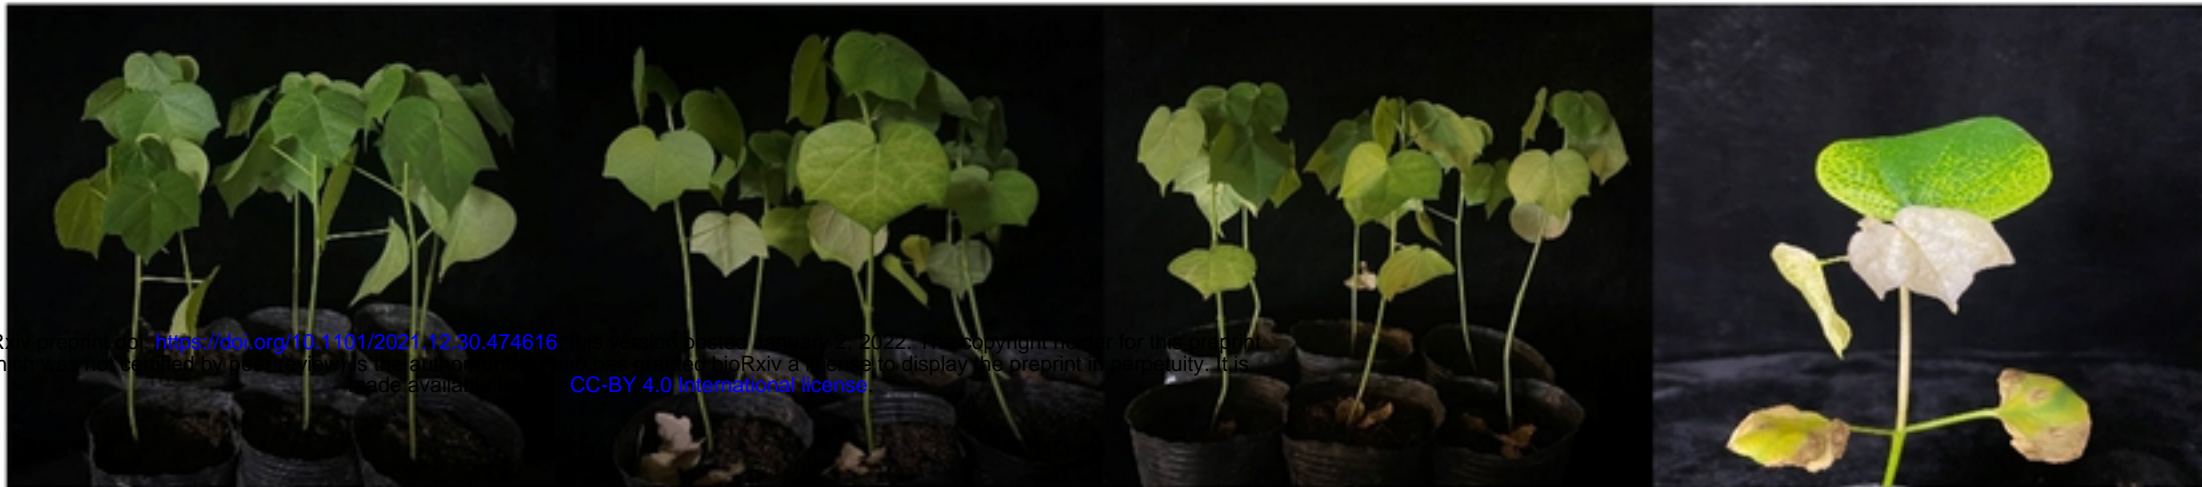**WT****TRV:00****TRV:ERF105****TRV:PDS****B**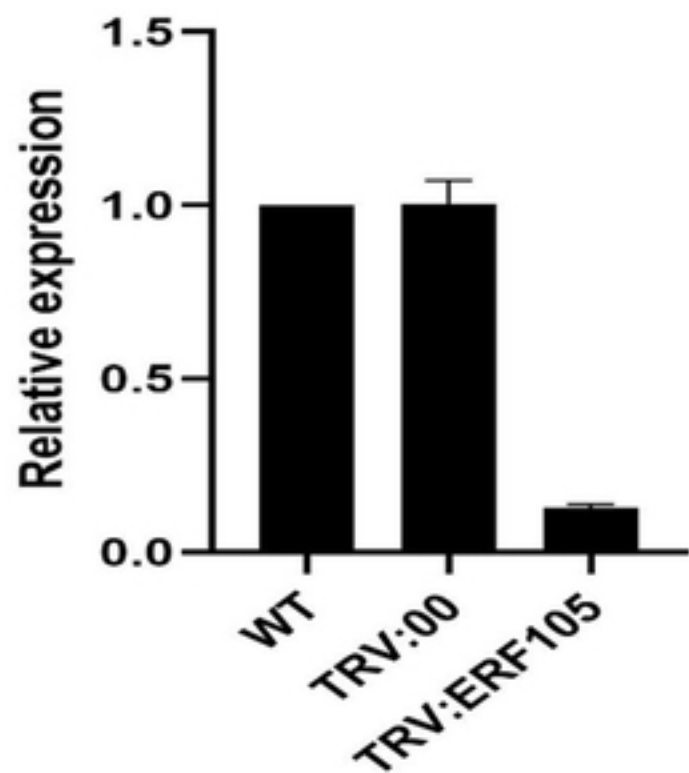**C**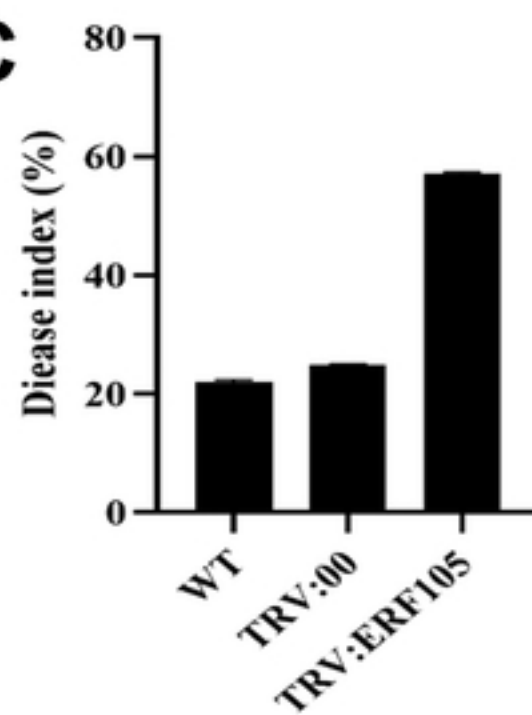**D**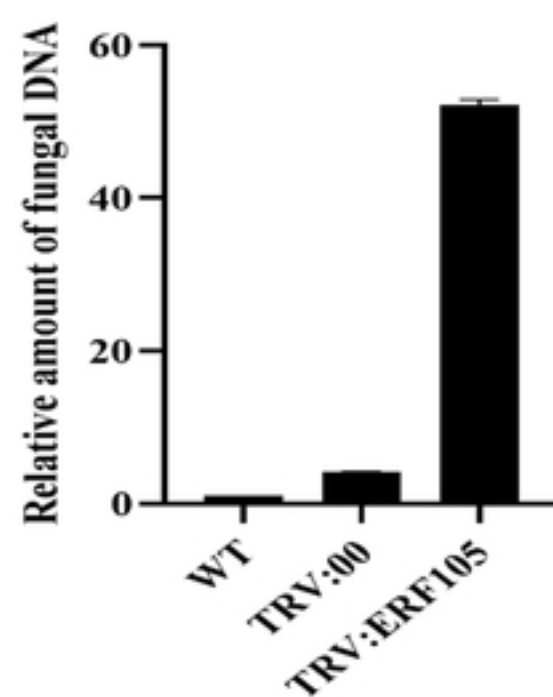**E**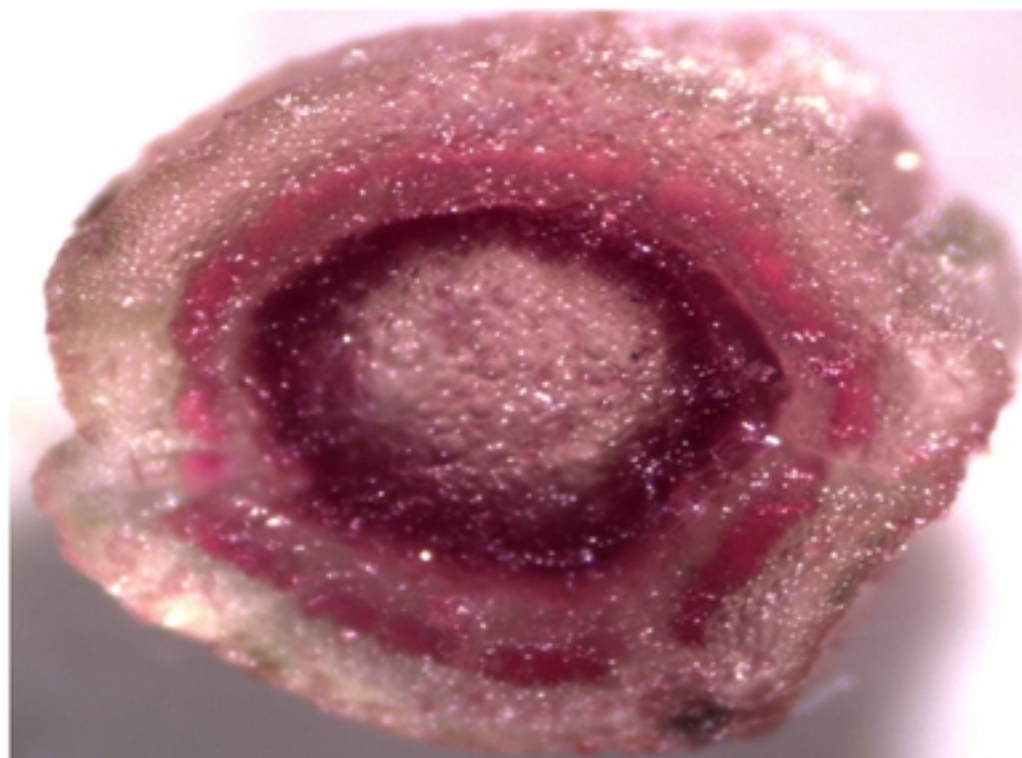**TRV:00**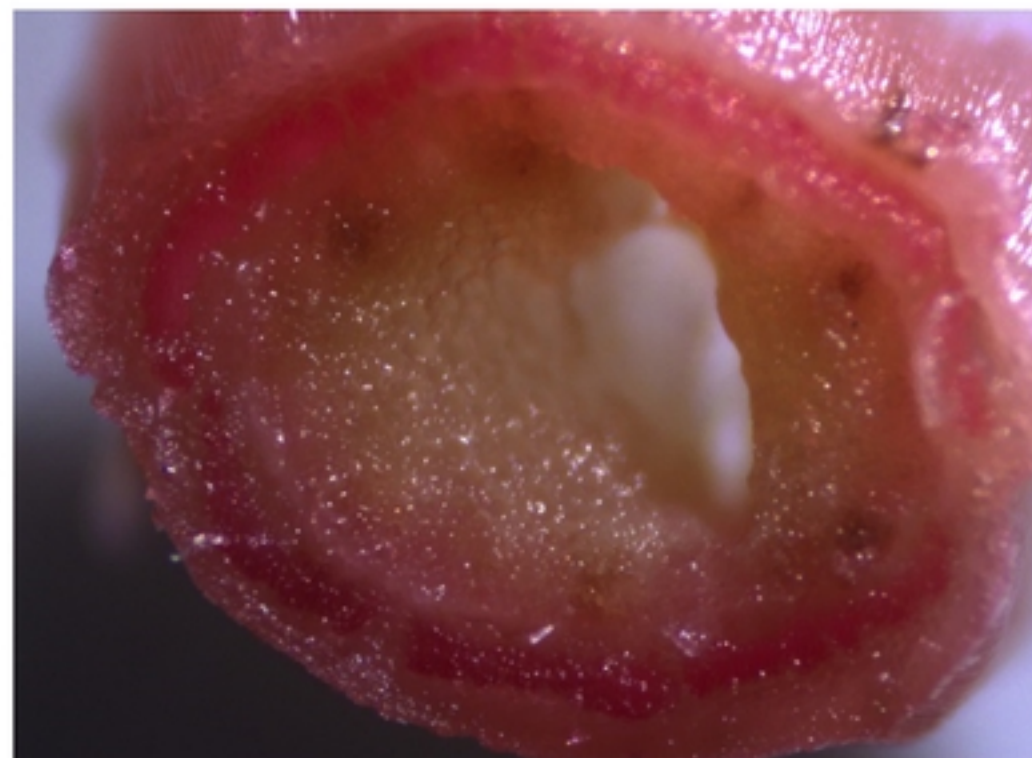**TRV:ERF105**

Figure 5

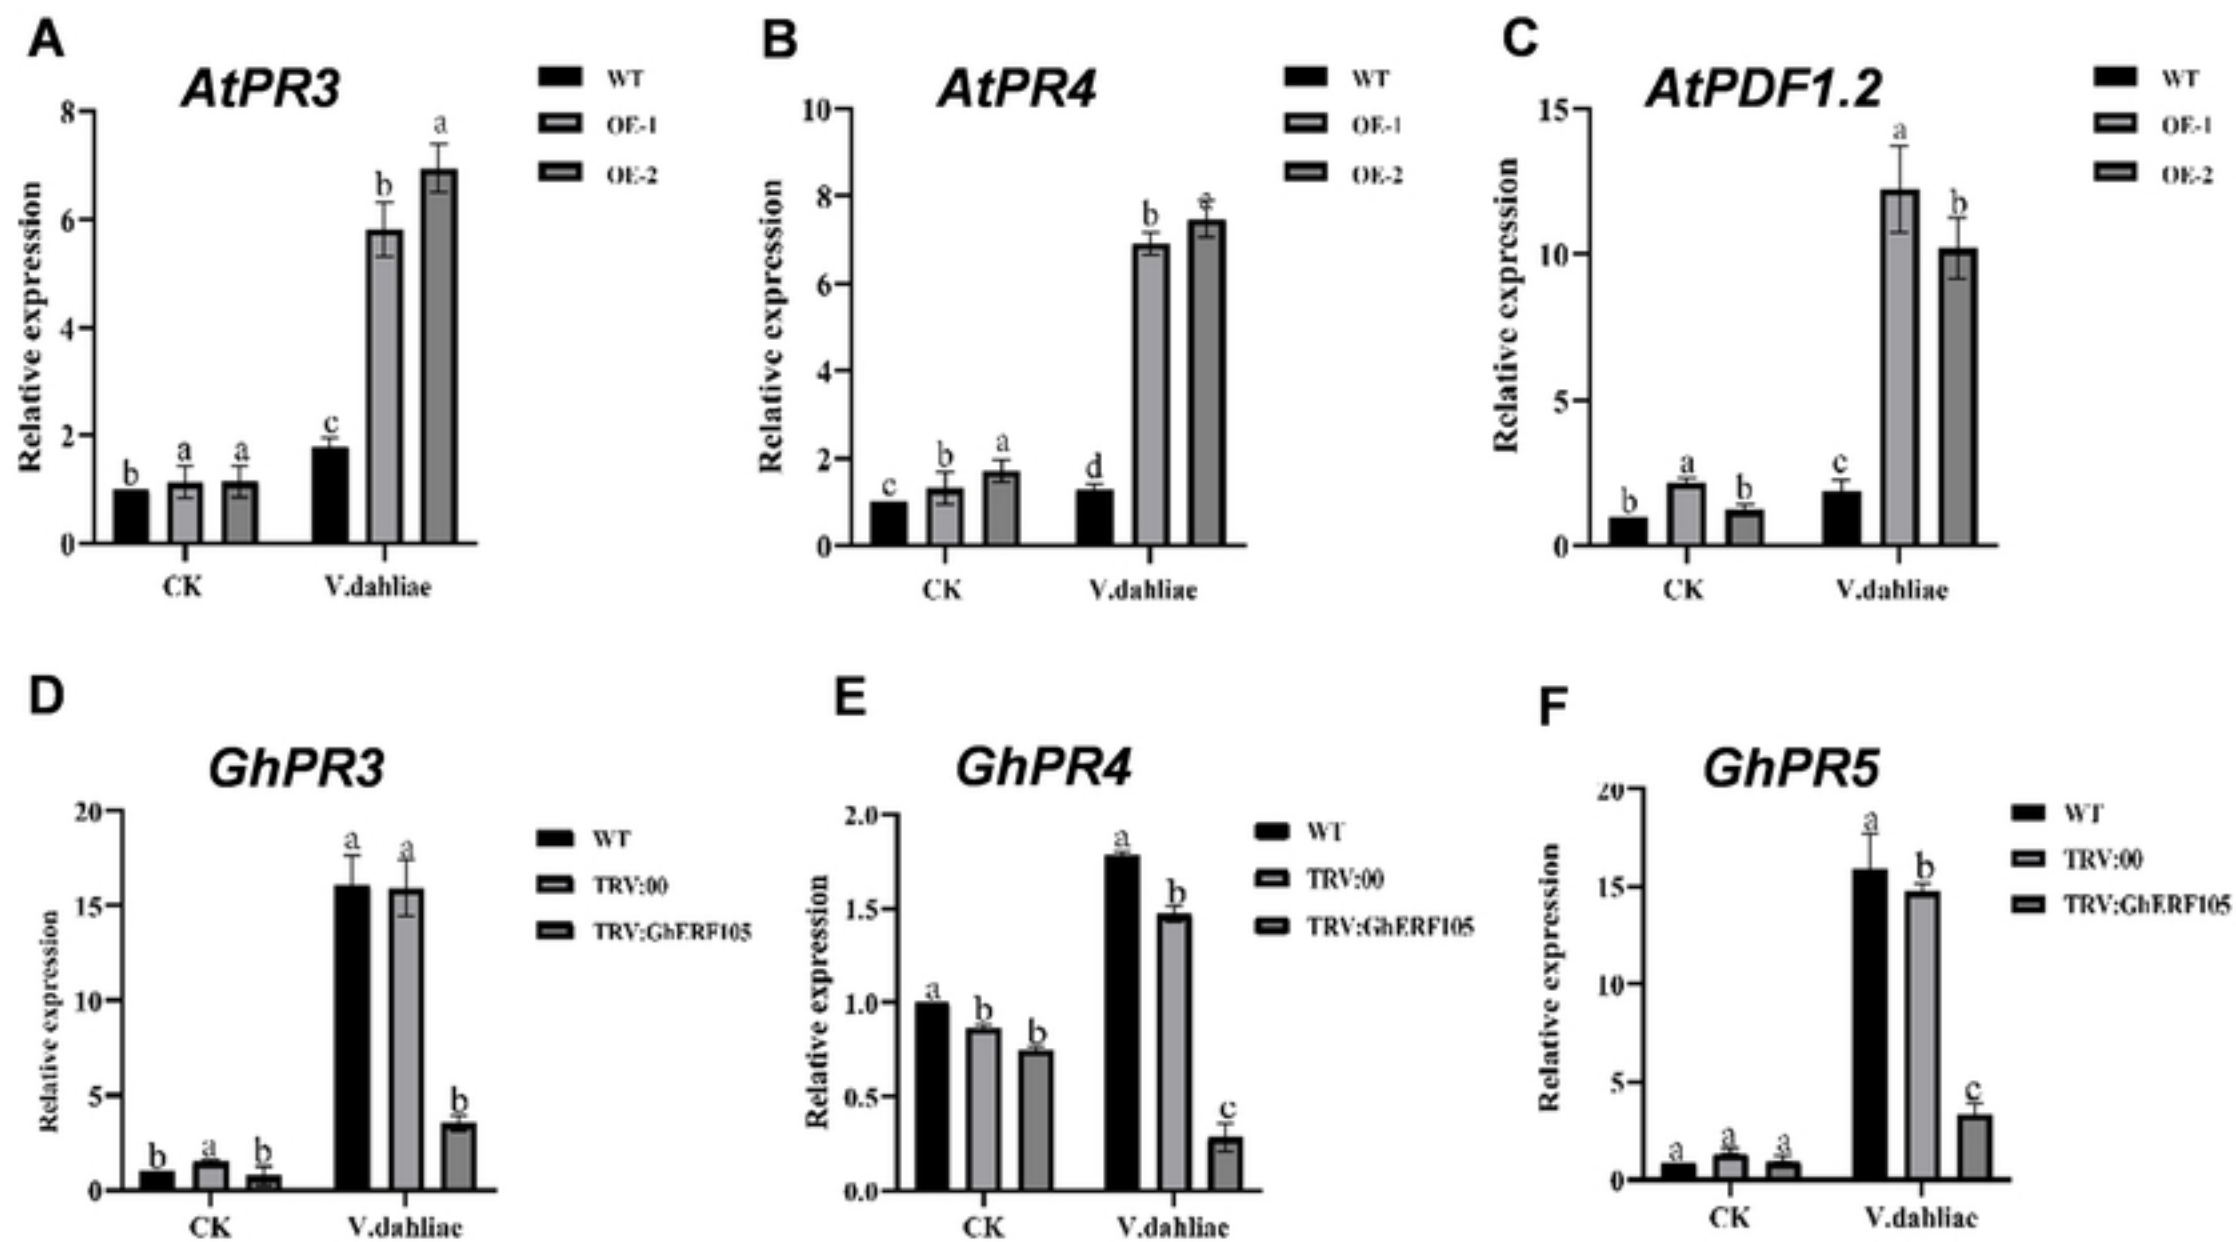

Figure 6
